# Supplementary material for: Design, synthesis, and biological evaluation of new arjunolic acid derivatives as anticancer agents
Source: Royal Society of Chemistry journal article supplement (doi:10.1039/d2md00275b), 2022-12-19
Supplement: d2md00275b1.pdf [file d2md00275b1.pdf]

## Supporting Information

### Design, synthesis, and biological evaluation of new arjunolic acid derivatives as anticancer agents

**Bruno M.F. Gonçalves,<sup>a,b†</sup> Vanessa I. S. Mendes<sup>a,b†</sup>, Samuel M. Silvestre<sup>b,c</sup> and Jorge A. R. Salvador,<sup>b,d\*</sup>**

<sup>a</sup> *CHEM4PHARMA, Biocant - Parque Tecnológico de Cantanhede, Núcleo 4, Lote 14, 3060-197, Cantanhede, Portugal*

<sup>b</sup> *Center for Neuroscience and Cell Biology, Coimbra, Portugal*

<sup>c</sup> *CICS-UBI - Health Sciences Research Centre, University of Beira Interior, Av. Infante D. Henrique, 6200-506, Covilhã, Portugal*

<sup>d</sup> *Laboratory of Pharmaceutical Chemistry, Faculty of Pharmacy, University of Coimbra, 3000-548 Coimbra, Portugal. Fax: +351 239 488 503; Tel: +351 239 488 400; E-mail: [salvador@ci.uc.pt](mailto:salvador@ci.uc.pt).*

*†These authors contributed equally to this work*

## Table of Contents

|                                                                                                 |    |
|-------------------------------------------------------------------------------------------------|----|
| 1.1 $^1\text{H}$ -NMR spectrum for Arjunolic acid 1 recorded in $\text{CH}_3\text{OD}$ .....    | 5  |
| 1.2 $^{13}\text{C}$ -NMR spectrum for Arjunolic acid 1 recorded in $\text{CH}_3\text{OD}$ ..... | 5  |
| 2. NMR data for compound 2.....                                                                 | 6  |
| 2.1 $^1\text{H}$ -NMR spectrum for compound 2 recorded in $\text{CDCl}_3$ .....                 | 7  |
| 2.2 $^{13}\text{C}$ -NMR spectrum for compound 2 recorded in $\text{CDCl}_3$ .....              | 7  |
| 3. NMR data for compound 3.....                                                                 | 8  |
| 3.1 $^1\text{H}$ -NMR spectrum for compound 3 recorded in $\text{CDCl}_3$ .....                 | 9  |
| 3.2 $^{13}\text{C}$ -NMR spectrum for compound 3 recorded in $\text{CDCl}_3$ .....              | 9  |
| 4. NMR data for compound 4.....                                                                 | 10 |
| 4.1 $^1\text{H}$ -NMR spectrum for compound 4 recorded in $\text{CDCl}_3$ .....                 | 11 |
| 4.2 $^{13}\text{C}$ -NMR spectrum for compound 4 recorded in $\text{CDCl}_3$ .....              | 11 |
| 5. NMR data for compound 5.....                                                                 | 12 |
| 5.1 $^1\text{H}$ -NMR spectrum for compound 5 recorded in $\text{CDCl}_3$ .....                 | 13 |
| 5.2 $^{13}\text{C}$ -NMR spectrum for compound 5 recorded in $\text{CDCl}_3$ .....              | 13 |
| 6. NMR data for compound 6.....                                                                 | 15 |
| 6.1 $^1\text{H}$ -NMR spectrum for compound 6 recorded in $\text{CH}_3\text{OD}$ .....          | 15 |
| 6.2 $^{13}\text{C}$ -NMR spectrum for compound 6 recorded in $\text{CH}_3\text{OD}$ .....       | 16 |
| 7. NMR data for compound 7.....                                                                 | 17 |
| 7.1 $^1\text{H}$ -NMR spectrum for compound 7 recorded in $\text{CDCl}_3$ .....                 | 17 |
| 7.2 $^{13}\text{C}$ -NMR spectrum for compound 7 recorded in $\text{CDCl}_3$ .....              | 18 |
| 8. NMR data for compound 8.....                                                                 | 19 |
| 8.1 $^1\text{H}$ -NMR spectrum for compound 8 recorded in $\text{CDCl}_3$ .....                 | 19 |
| 8.2 $^{13}\text{C}$ -NMR spectrum for compound 8 recorded in $\text{CDCl}_3$ .....              | 20 |
| 9. NMR data for compound 9.....                                                                 | 21 |
| 9.1 $^1\text{H}$ -NMR spectrum for compound 9 recorded in $\text{CDCl}_3$ .....                 | 21 |
| 9.2 $^{13}\text{C}$ -NMR spectrum for compound 9 recorded in $\text{CDCl}_3$ .....              | 22 |
| 10. NMR data for compound 10.....                                                               | 23 |
| 10.1 $^1\text{H}$ -NMR spectrum for compound 10 recorded in $\text{CDCl}_3$ .....               | 23 |
| 10.2 $^{13}\text{C}$ -NMR spectrum for compound 10 recorded in $\text{CDCl}_3$ .....            | 24 |
| 11. NMR data for compound 12.....                                                               | 25 |
| 11.1 $^1\text{H}$ -NMR spectrum for compound 12 recorded in $\text{CDCl}_3$ .....               | 25 |
| 11.2 $^{13}\text{C}$ -NMR spectrum for compound 12 recorded in $\text{CDCl}_3$ .....            | 26 |
| 12. NMR data for compound 14.....                                                               | 27 |
| 12.1 $^1\text{H}$ -NMR spectrum for compound 14 recorded in $\text{CDCl}_3$ .....               | 27 |
| 12.2 $^{13}\text{C}$ -NMR spectrum for compound 14 recorded in $\text{CDCl}_3$ .....            | 28 |
| 13. NMR data for compound 15.....                                                               | 29 |
| 13.1 $^1\text{H}$ -NMR spectrum for compound 15 recorded in $\text{CDCl}_3$ .....               | 29 |

|      |                                                                                  |    |
|------|----------------------------------------------------------------------------------|----|
| 13.2 | <sup>13</sup> C-NMR spectrum for compound 15 recorded in CDCl <sub>3</sub> ..... | 30 |
| 14.  | NMR data for compound 16.....                                                    | 31 |
| 14.1 | <sup>1</sup> H-NMR spectrum for compound 16 recorded in CDCl <sub>3</sub> .....  | 31 |
| 14.2 | <sup>13</sup> C-NMR spectrum for compound 16 recorded in CDCl <sub>3</sub> ..... | 32 |
| 15.  | NMR data for compound 17.....                                                    | 33 |
| 15.1 | <sup>1</sup> H-NMR spectrum for compound 17 recorded in CDCl <sub>3</sub> .....  | 33 |
| 15.2 | <sup>13</sup> C-NMR spectrum for compound 17 recorded in CDCl <sub>3</sub> ..... | 34 |
| 16.  | NMR data for compound 18.....                                                    | 35 |
| 16.1 | <sup>1</sup> H-NMR spectrum for compound 18 recorded in CDCl <sub>3</sub> .....  | 35 |
| 16.2 | <sup>13</sup> C-NMR spectrum for compound 18 recorded in CDCl <sub>3</sub> ..... | 36 |
| 17.  | NMR data for compound 19.....                                                    | 37 |
| 17.1 | <sup>1</sup> H-NMR spectrum for compound 19 recorded in CDCl <sub>3</sub> .....  | 37 |
| 17.2 | <sup>13</sup> C-NMR spectrum for compound 19 recorded in CDCl <sub>3</sub> ..... | 38 |
| 18.  | NMR data for compound 20.....                                                    | 39 |
| 18.1 | <sup>1</sup> H-NMR spectrum for compound 20 recorded in CDCl <sub>3</sub> .....  | 39 |
| 18.2 | <sup>13</sup> C-NMR spectrum for compound 20 recorded in CDCl <sub>3</sub> ..... | 40 |
| 18.3 | COSY spectrum for compound 20 recorded in CDCl <sub>3</sub> .....                | 41 |
| 18.4 | NOESY spectrum for compound 20 recorded in CDCl <sub>3</sub> .....               | 42 |
| 18.4 | HSQC spectrum for compound 20 recorded in CDCl <sub>3</sub> .....                | 43 |
| 18.4 | HMBC spectrum for compound 20 recorded in CDCl <sub>3</sub> .....                | 44 |
| 19.  | NMR data for compound 22.....                                                    | 45 |
| 19.1 | <sup>1</sup> H-NMR spectrum for compound 22 recorded in CDCl <sub>3</sub> .....  | 45 |
| 19.2 | <sup>13</sup> C-NMR spectrum for compound 22 recorded in CDCl <sub>3</sub> ..... | 46 |
| 20.  | NMR data for compound 23.....                                                    | 47 |
| 20.1 | <sup>1</sup> H-NMR spectrum for compound 23 recorded in CDCl <sub>3</sub> .....  | 47 |
| 20.2 | <sup>13</sup> C-NMR spectrum for compound 23 recorded in CDCl <sub>3</sub> ..... | 48 |
| 21.  | NMR data for compound 24.....                                                    | 49 |
| 21.1 | <sup>1</sup> H-NMR spectrum for compound 24 recorded in CDCl <sub>3</sub> .....  | 49 |
| 21.2 | <sup>13</sup> C-NMR spectrum for compound 24 recorded in CDCl <sub>3</sub> ..... | 50 |
| 22.  | NMR data for compound 25.....                                                    | 51 |
| 22.1 | <sup>1</sup> H-NMR spectrum for compound 25 recorded in CDCl <sub>3</sub> .....  | 51 |
| 22.2 | <sup>13</sup> C-NMR spectrum for compound 25 recorded in CDCl <sub>3</sub> ..... | 52 |
| 23.  | NMR data for compound 26.....                                                    | 53 |
| 23.1 | <sup>1</sup> H-NMR spectrum for compound 26 recorded in CDCl <sub>3</sub> .....  | 53 |
| 23.2 | <sup>13</sup> C-NMR spectrum for compound 26 recorded in CDCl <sub>3</sub> ..... | 54 |
| 24.  | NMR data for compound 27.....                                                    | 55 |
| 24.1 | <sup>1</sup> H-NMR spectrum for compound 27 recorded in CDCl <sub>3</sub> .....  | 55 |
| 24.2 | <sup>13</sup> C-NMR spectrum for compound 27 recorded in CDCl <sub>3</sub> ..... | 56 |

|                                                                                                                                                                                            |    |
|--------------------------------------------------------------------------------------------------------------------------------------------------------------------------------------------|----|
| 25. NMR data for compound 28.....                                                                                                                                                          | 57 |
| 25.1 <sup>1</sup> H-NMR spectrum for compound 28 recorded in CDCl <sub>3</sub> .....                                                                                                       | 57 |
| 25.2 <sup>13</sup> C-NMR spectrum for compound 28 recorded in CDCl <sub>3</sub> .....                                                                                                      | 58 |
| 25.3 COSY spectrum for compound 28 recorded in CDCl <sub>3</sub> .....                                                                                                                     | 59 |
| 25.4 NOESY spectrum for compound 28 recorded in CDCl <sub>3</sub> .....                                                                                                                    | 60 |
| 25.5 HSQC spectrum for compound 28 recorded in CDCl <sub>3</sub> .....                                                                                                                     | 61 |
| 25.6 HMBC spectrum for compound 28 recorded in CDCl <sub>3</sub> .....                                                                                                                     | 62 |
| 26. Some COSY correlations for compound 20 .....                                                                                                                                           | 63 |
| 27. Some NOESY correlations for compound 20.....                                                                                                                                           | 63 |
| 28. Some HMBC correlations for compound 20.....                                                                                                                                            | 63 |
| 29. Some COSY correlations for compound 28 .....                                                                                                                                           | 64 |
| 30. Some NOESY correlations for compound 28.....                                                                                                                                           | 64 |
| 31. Some HMBC correlations for compound 28.....                                                                                                                                            | 64 |
| 32. Proposed mechanism for the formation of derivatives 13-20. ....                                                                                                                        | 65 |
| 33. Proposed mechanism for the formation of derivatives 21-28. ....                                                                                                                        | 65 |
| 34. In Silico studies.....                                                                                                                                                                 | 66 |
| 34.1 In silico molecular properties of compound 26 using the SwissADME predictive database. <sup>a</sup> .....                                                                             | 66 |
| 34.2 In silico pharmacokinetic (absorption, distribution, metabolism, and excretion) and toxicity parameters of compound 26 using pkCSM and SwissADME predictive databases. <sup>a</sup> . | 67 |

1.1  $^1\text{H-NMR}$  spectrum for Arjunolic acid 1 recorded in  $\text{CH}_3\text{OD}$

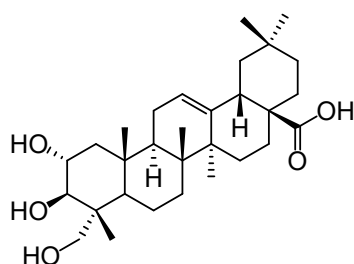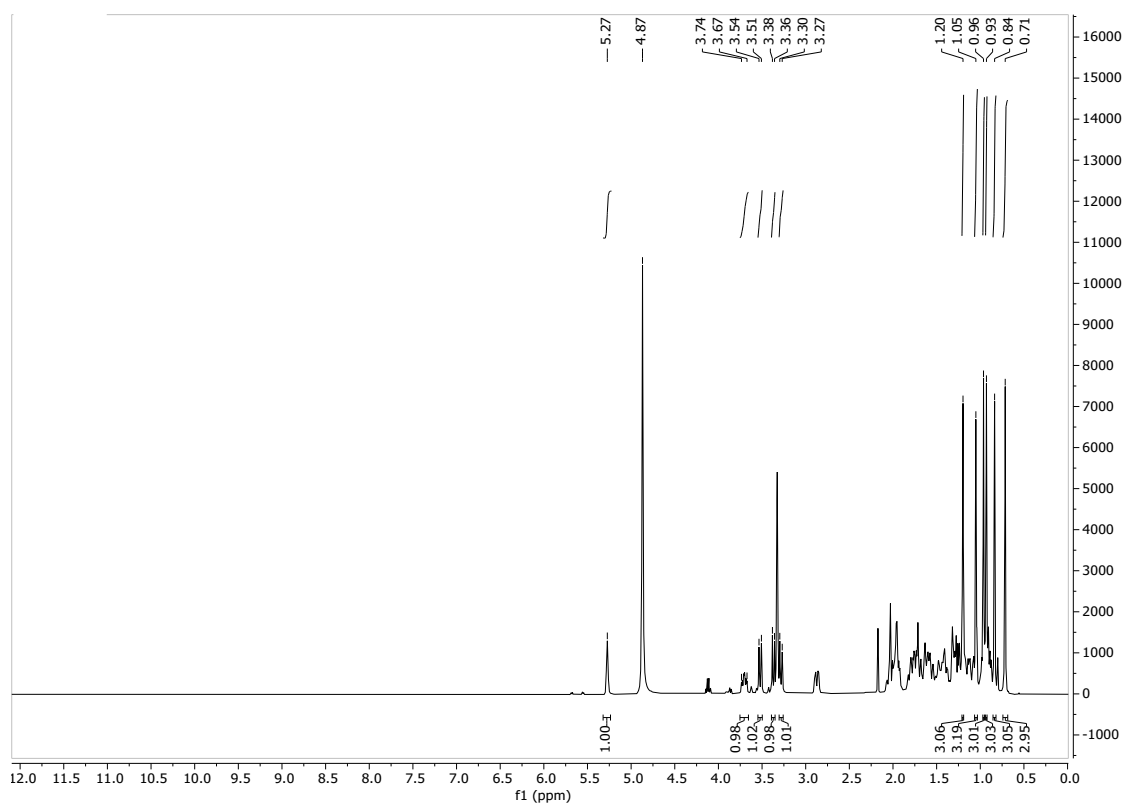

1.2  $^{13}\text{C-NMR}$  spectrum for Arjunolic acid 1 recorded in  $\text{CH}_3\text{OD}$

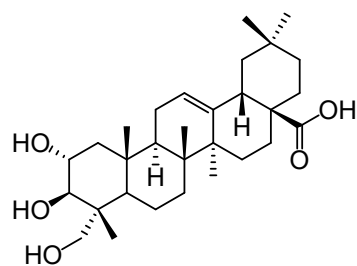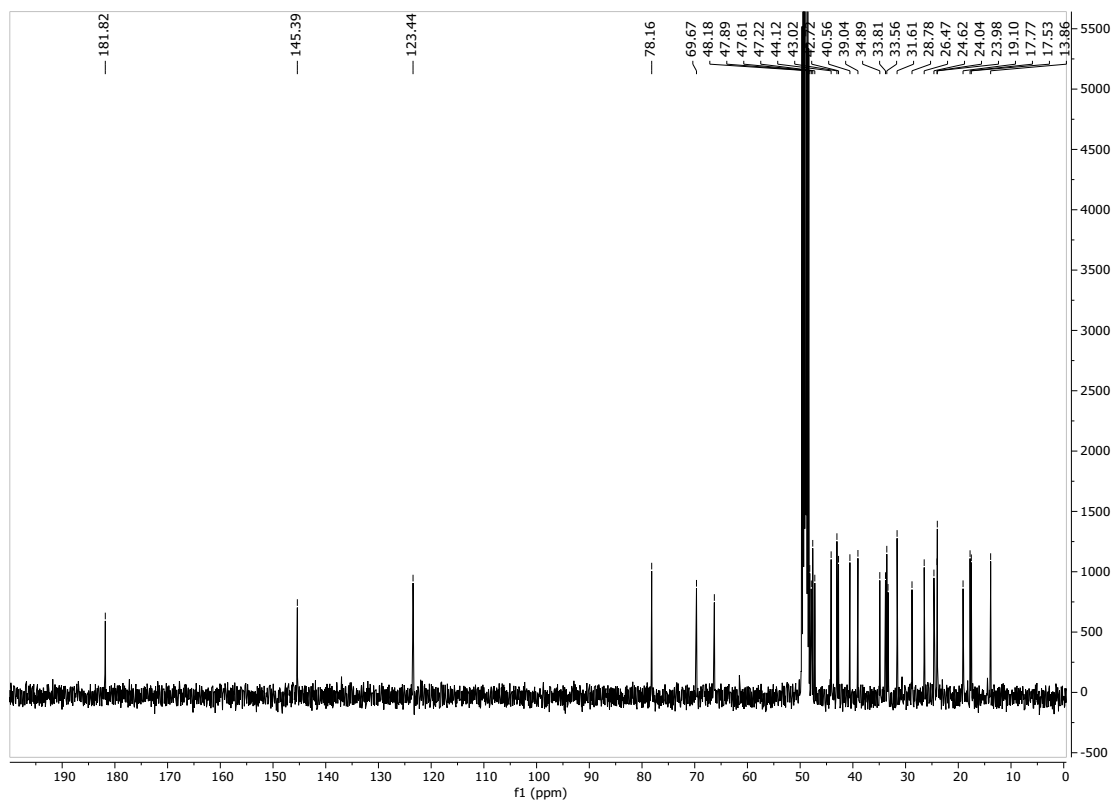

## 2. NMR data for compound 2

2.1  $^1\text{H-NMR}$  spectrum for compound 2 recorded in  $\text{CDCl}_3$

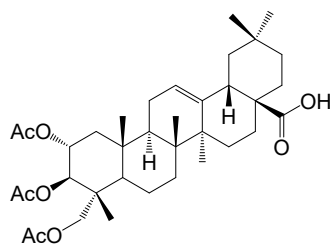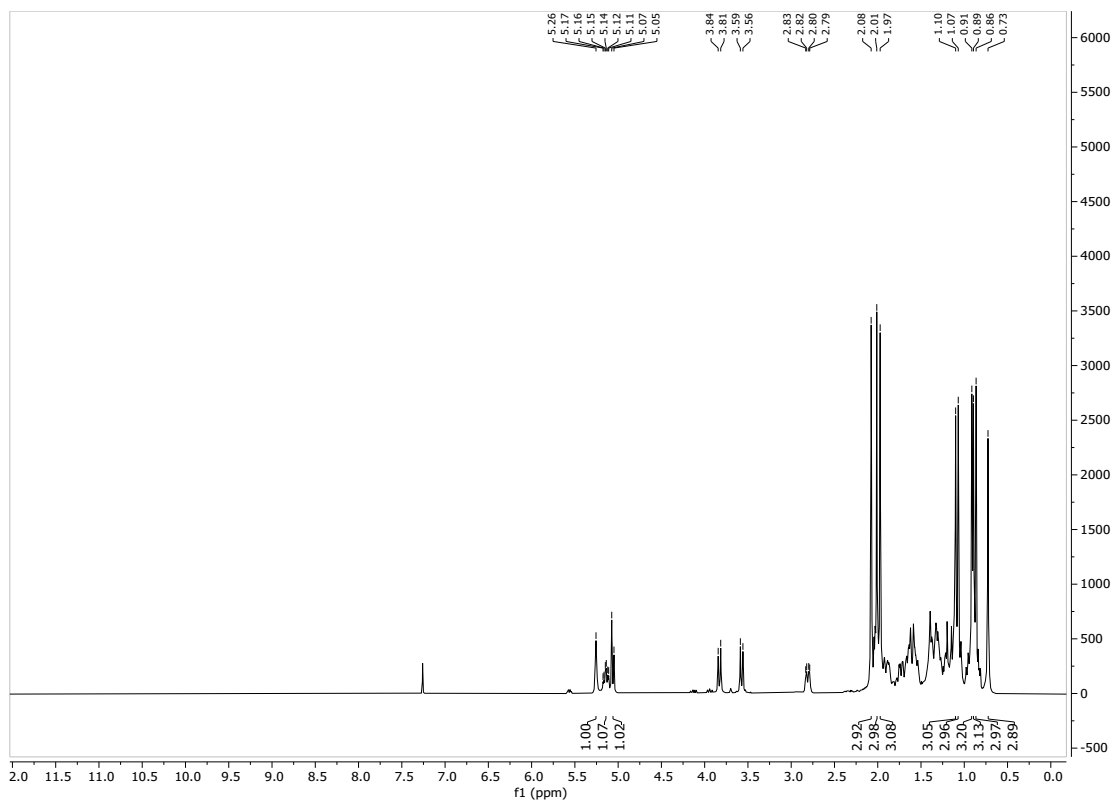

2.2  $^{13}\text{C-NMR}$  spectrum for compound 2 recorded in  $\text{CDCl}_3$

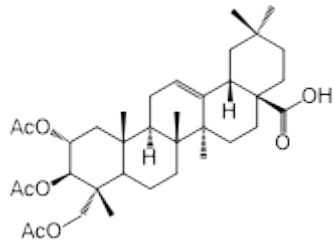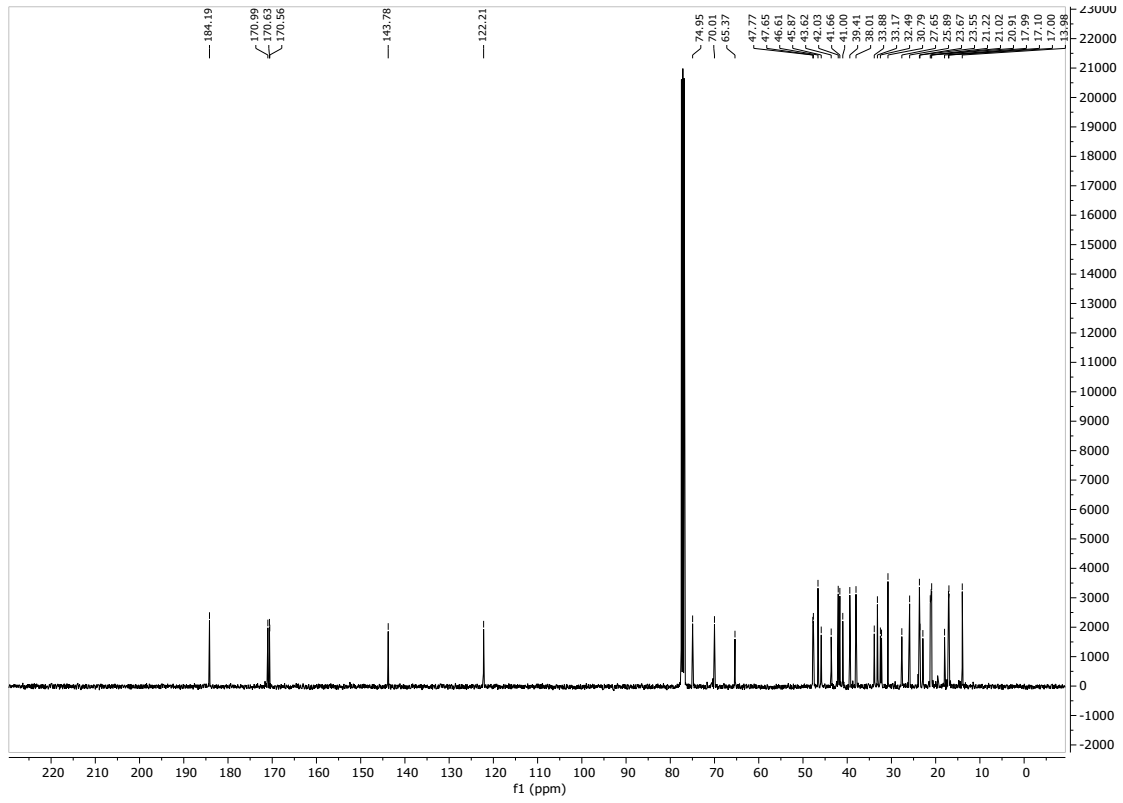

### 3. NMR data for compound 3



3.1  $^1\text{H}$ -NMR spectrum for compound 3 recorded in  $\text{CDCl}_3$

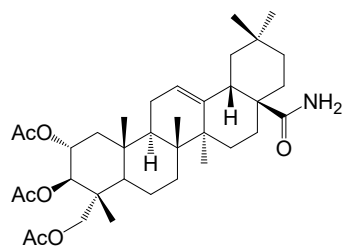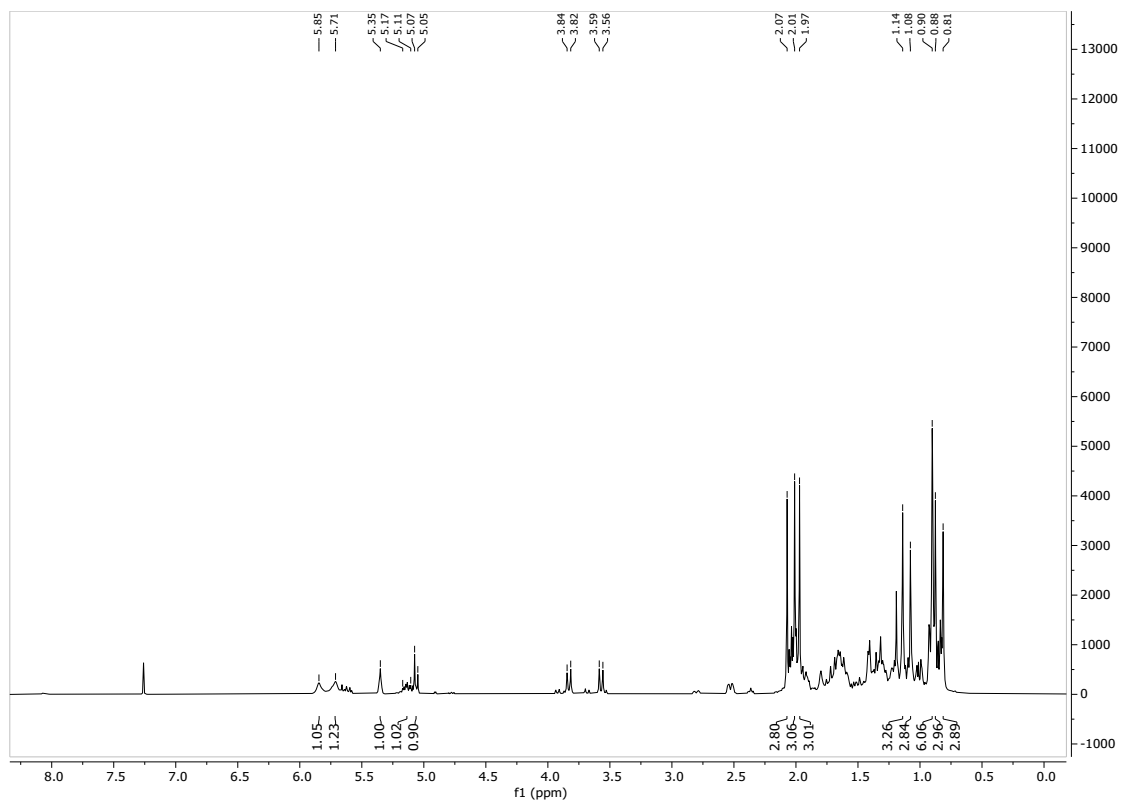

3.2  $^{13}\text{C}$ -NMR spectrum for compound 3 recorded in  $\text{CDCl}_3$

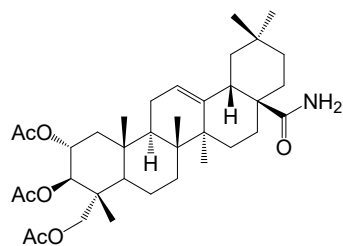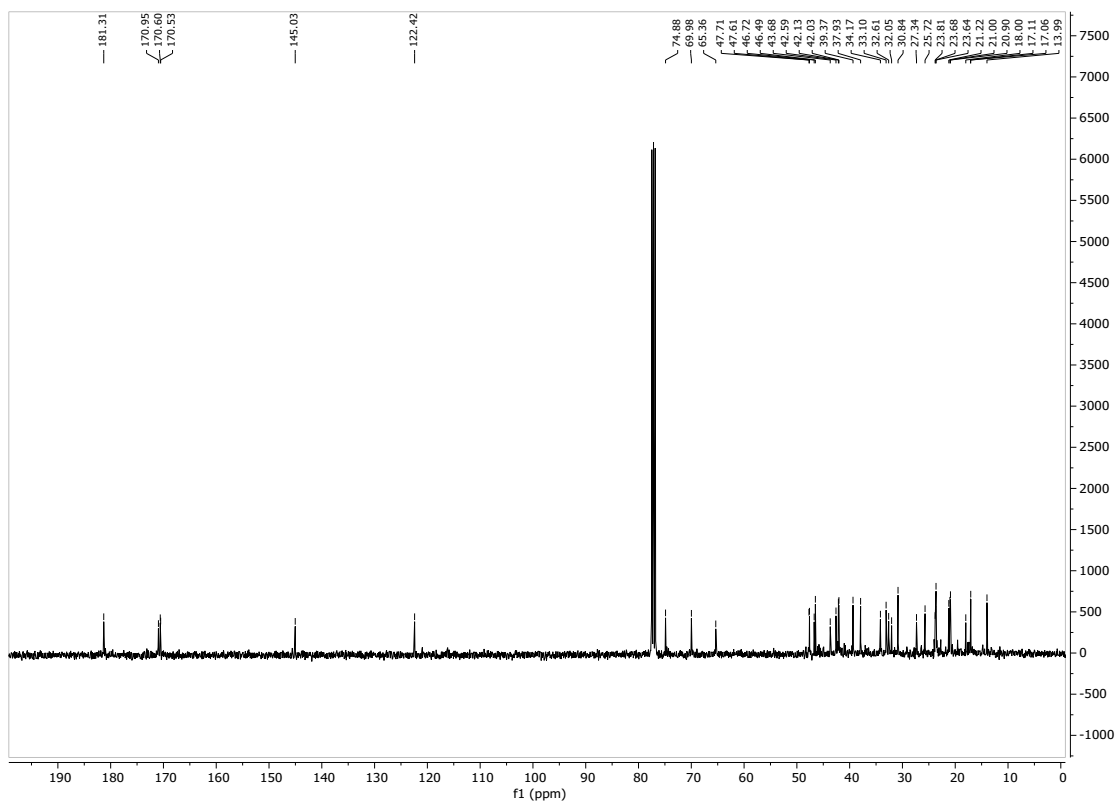

#### 4. NMR data for compound 4

4.1  $^1\text{H-NMR}$  spectrum for compound 4 recorded in  $\text{CDCl}_3$

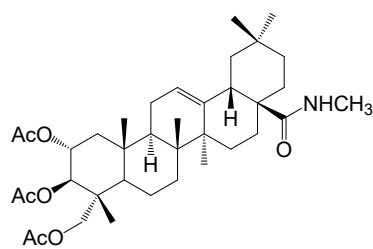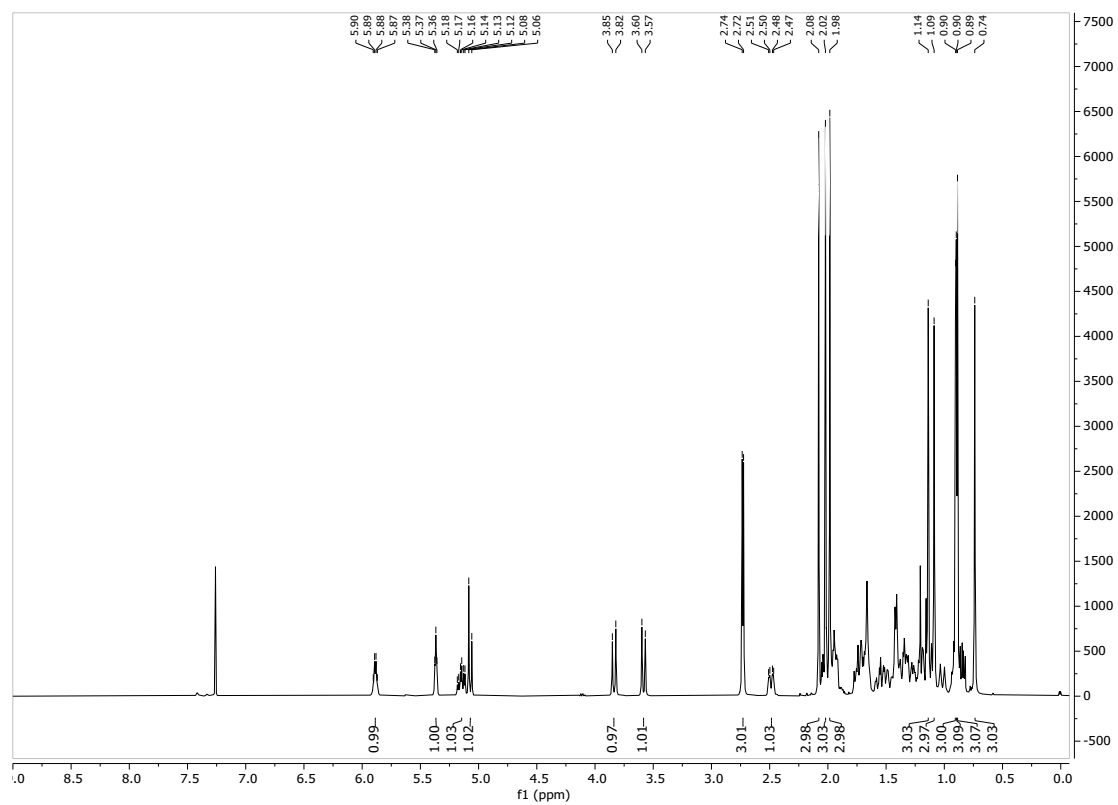

4.2  $^{13}\text{C-NMR}$  spectrum for compound 4 recorded in  $\text{CDCl}_3$

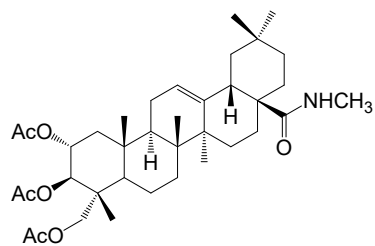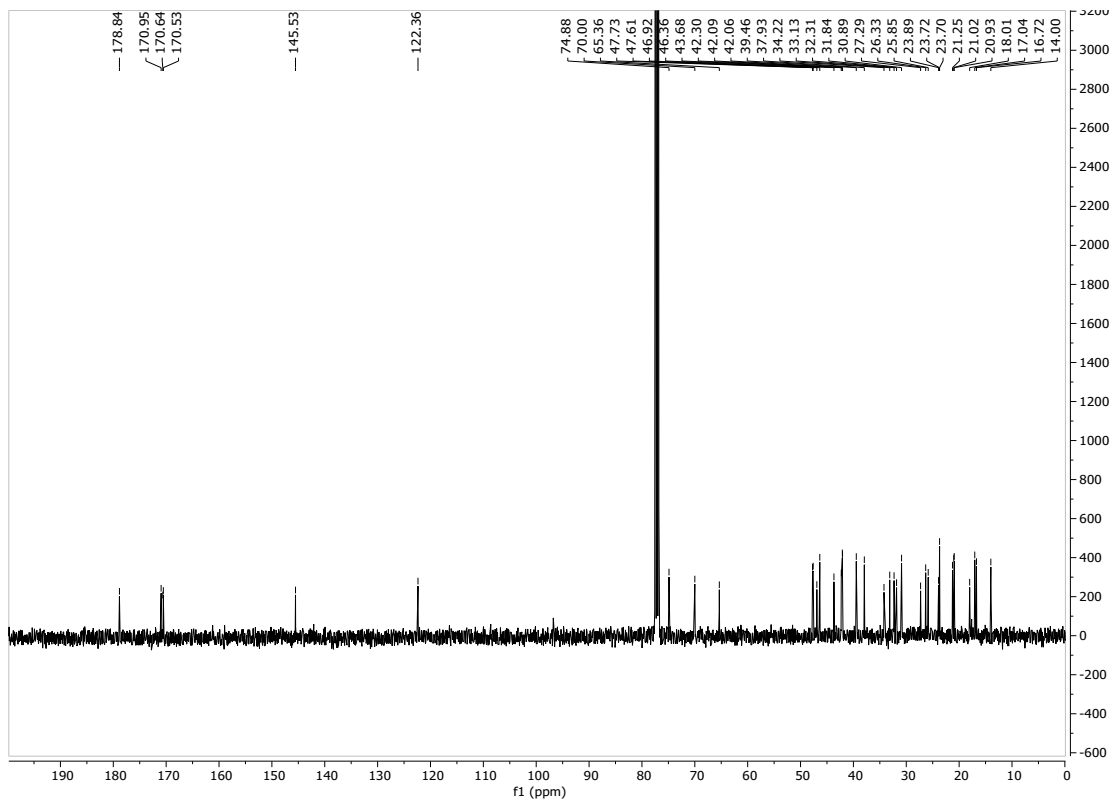

## 5. NMR data for compound 5

5.1  $^1\text{H-NMR}$  spectrum for compound 5 recorded in  $\text{CDCl}_3$

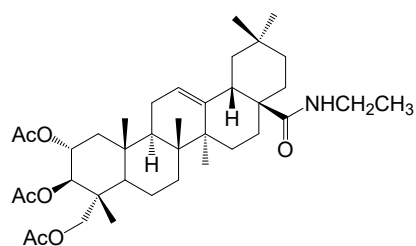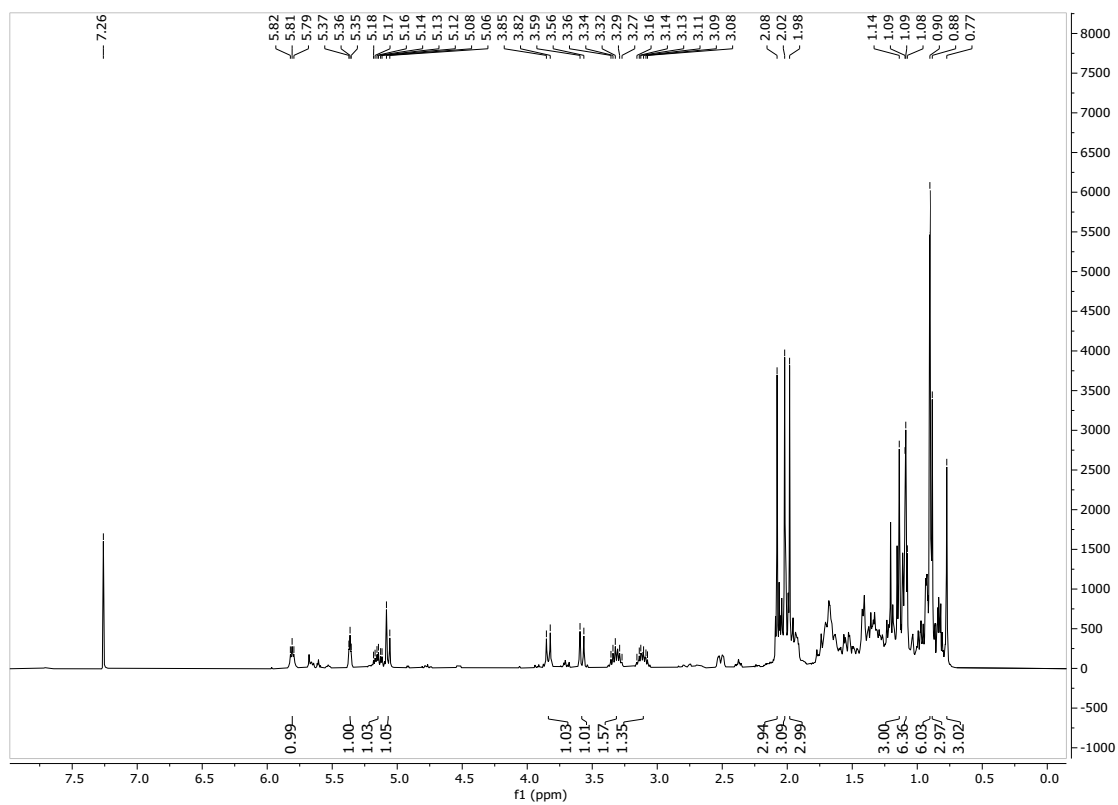

5.2  $^{13}\text{C-NMR}$  spectrum for compound 5 recorded in  $\text{CDCl}_3$

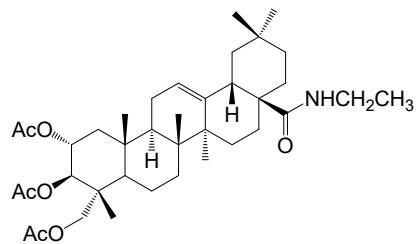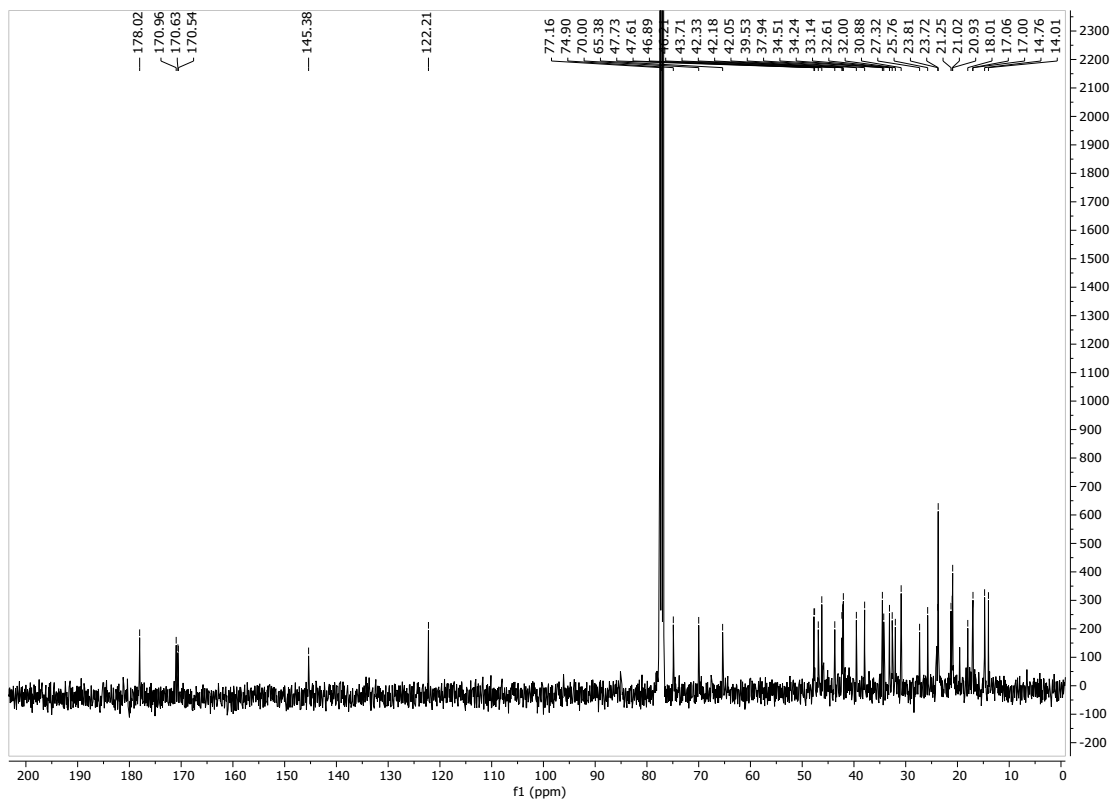

## 6. NMR data for compound 6

### 6.1 $^1\text{H-NMR}$ spectrum for compound 6 recorded in $\text{CH}_3\text{OD}$

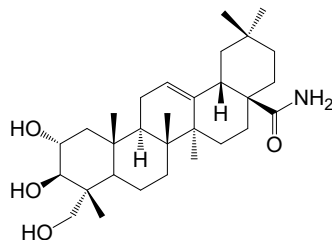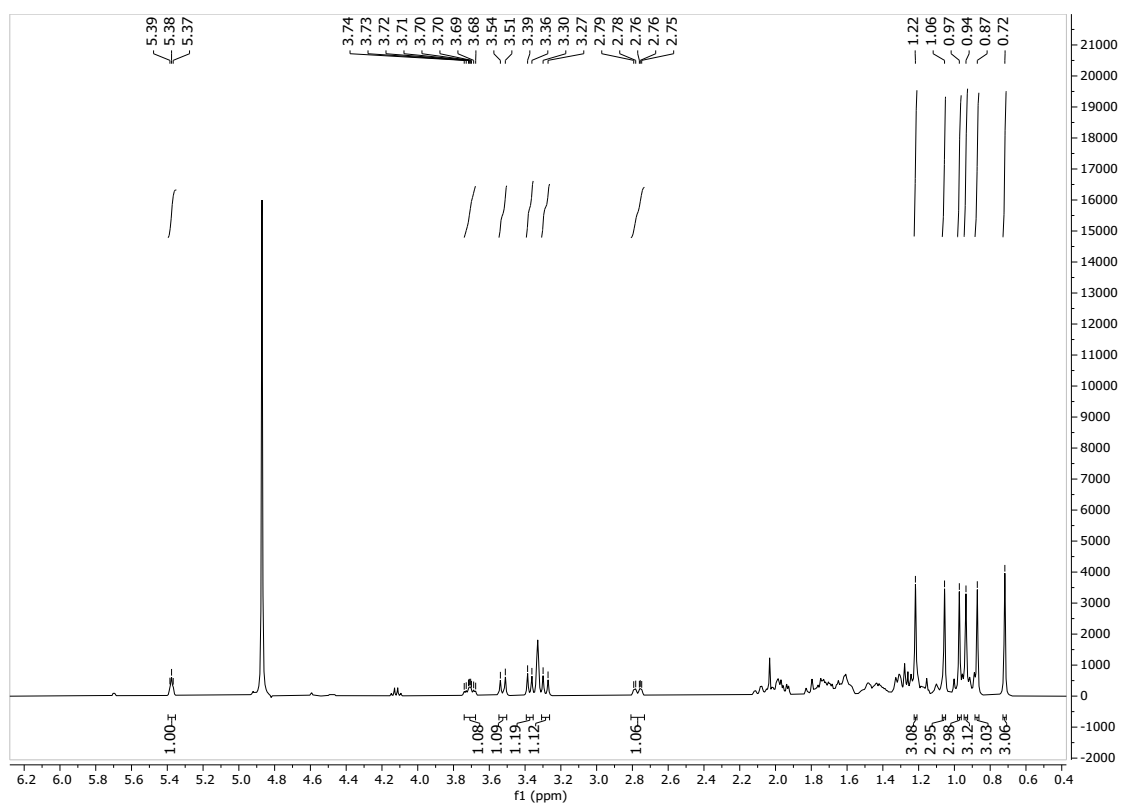

6.2  $^{13}\text{C}$ -NMR spectrum for compound 6 recorded in  $\text{CH}_3\text{OD}$

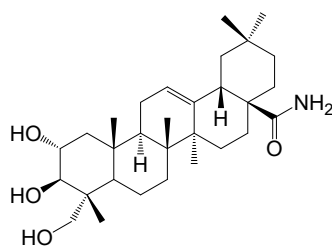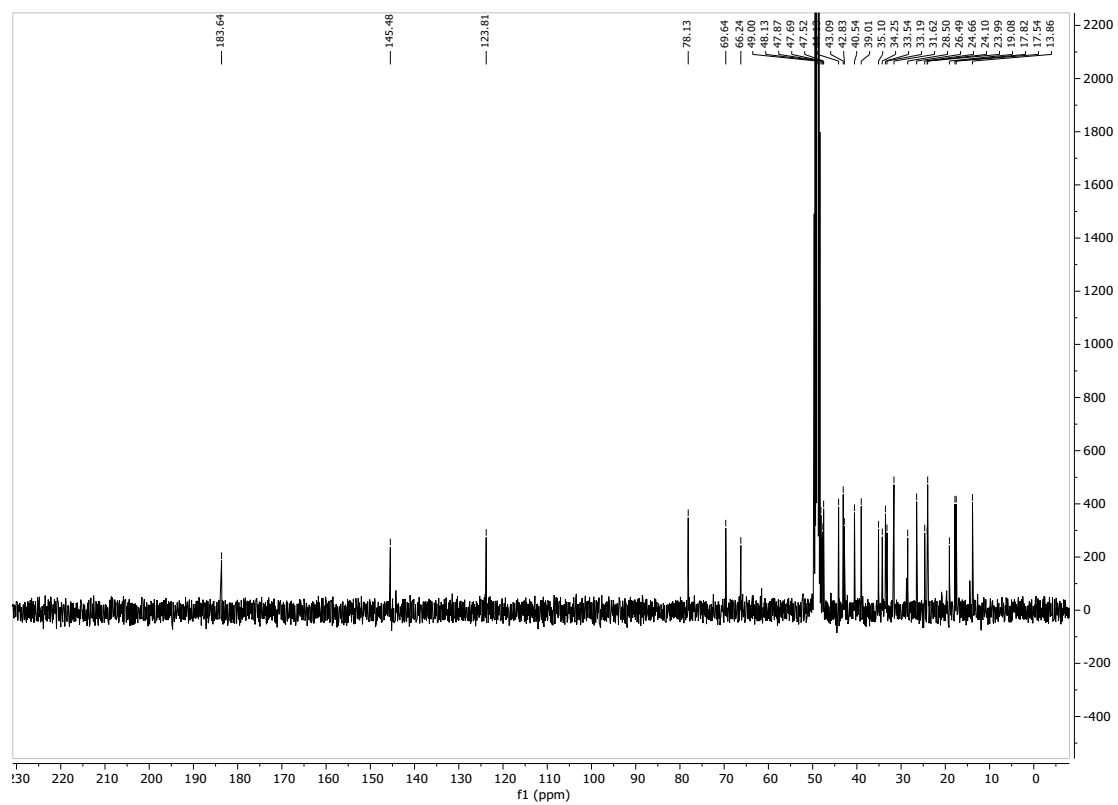



## 7. NMR data for compound 7

7.1  $^1\text{H-NMR}$  spectrum for compound 7 recorded in  $\text{CDCl}_3$

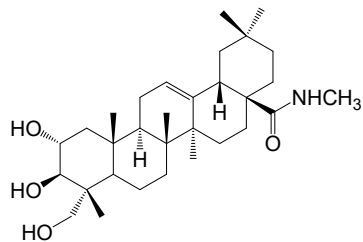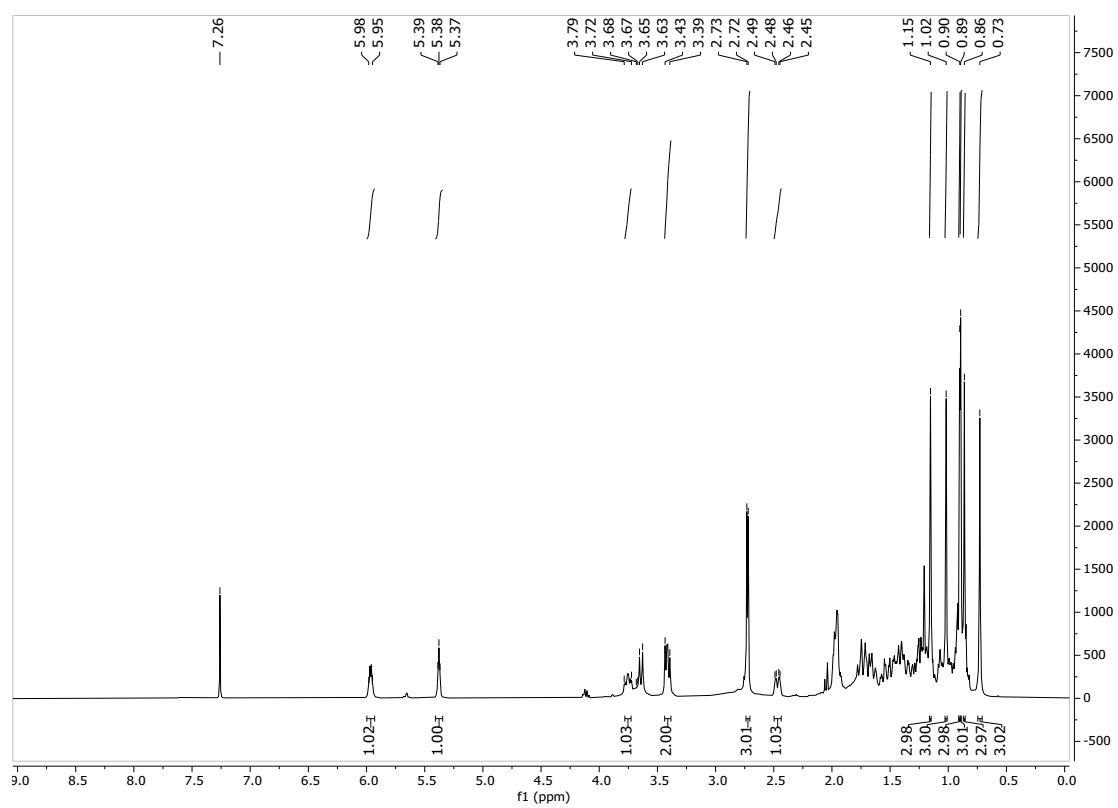

7.2  $^{13}\text{C}$ -NMR spectrum for compound 7 recorded in  $\text{CDCl}_3$

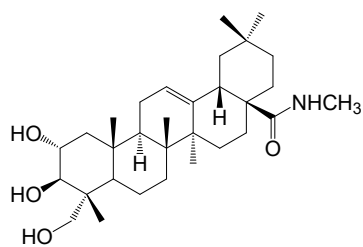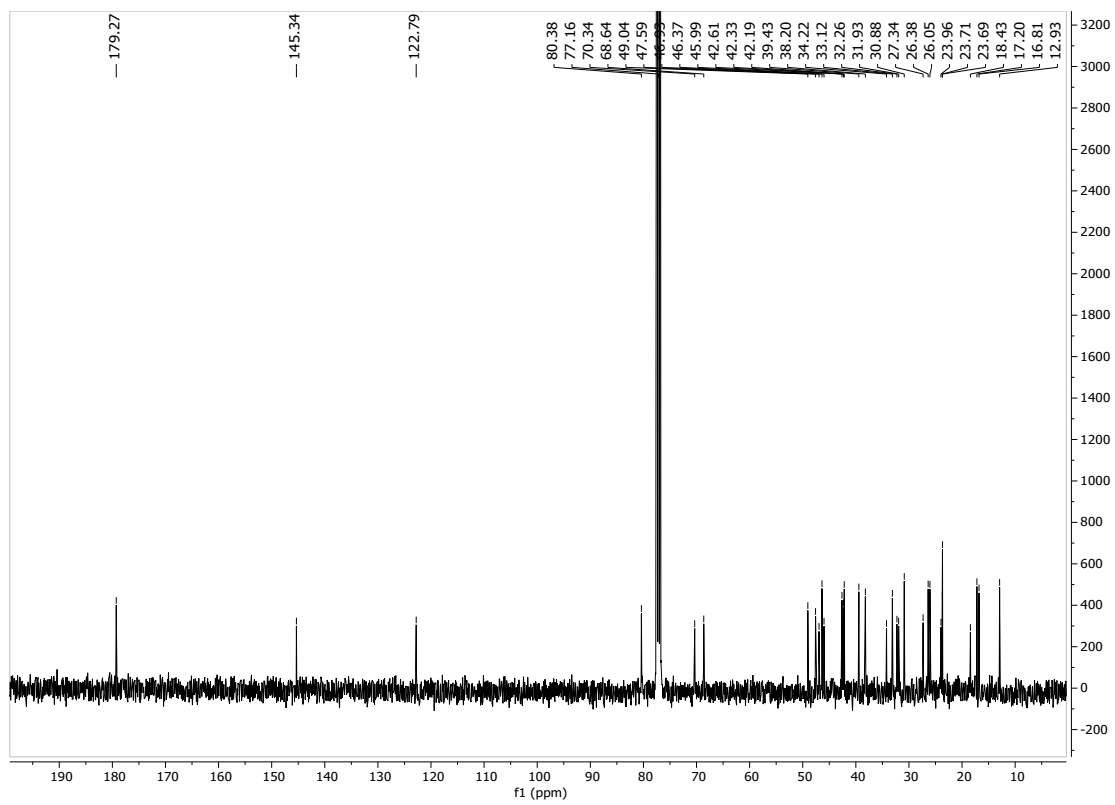

## 8. NMR data for compound 8

### 8.1 <sup>1</sup>H-NMR spectrum for compound 8 recorded in CDCl<sub>3</sub>

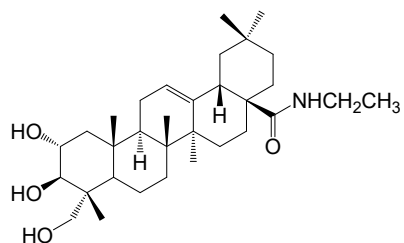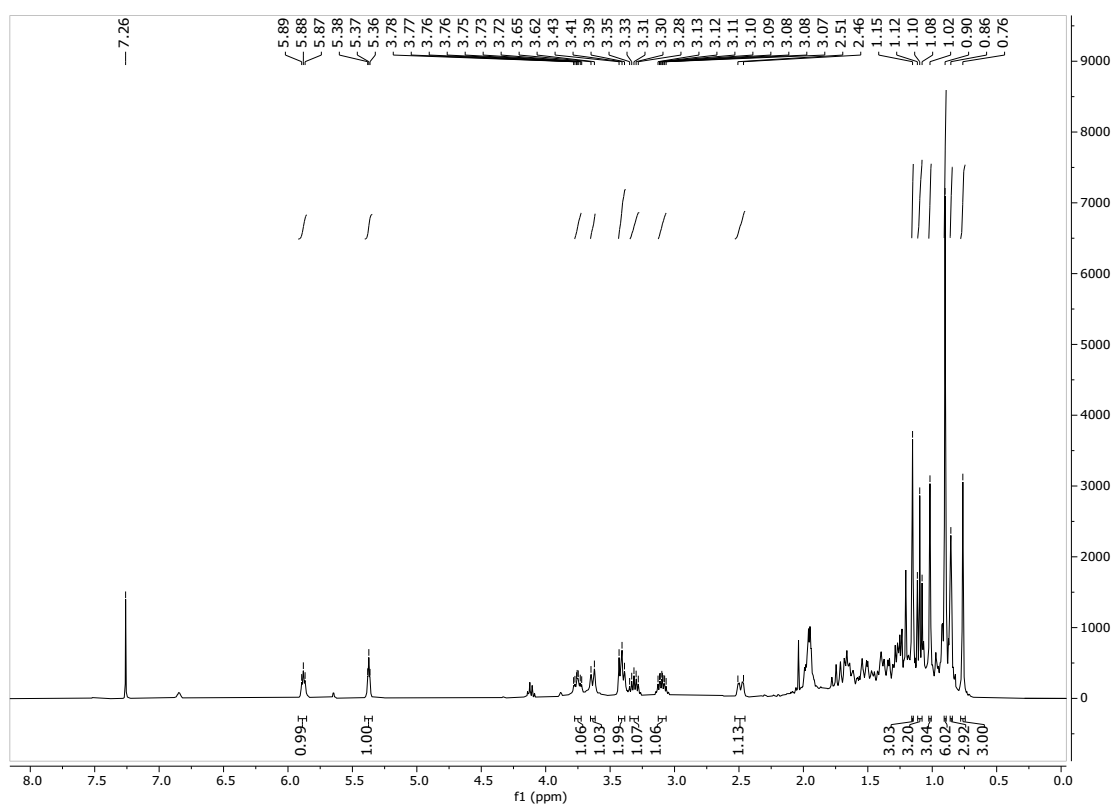

8.2  $^{13}\text{C}$ -NMR spectrum for compound 8 recorded in  $\text{CDCl}_3$

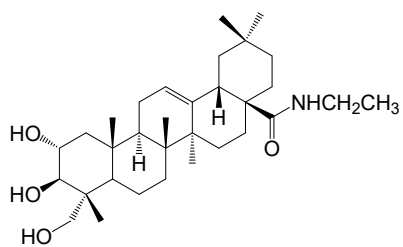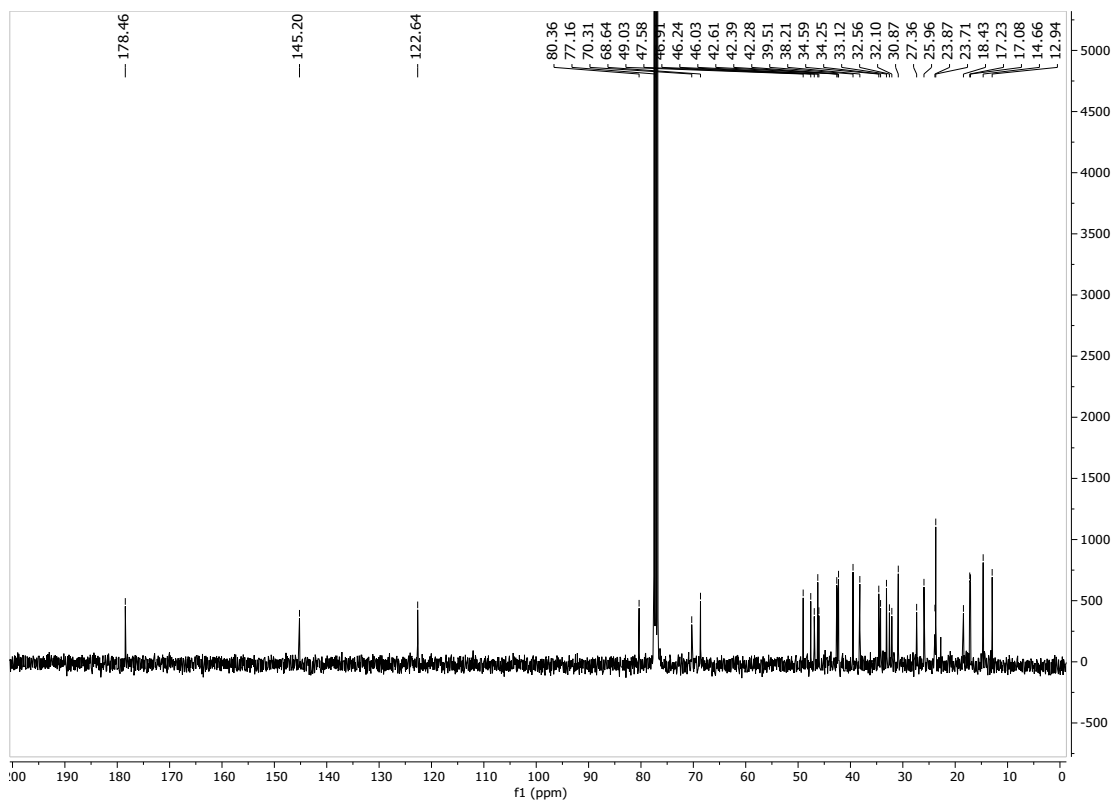

## 9. NMR data for compound 9

9.1  $^1\text{H-NMR}$  spectrum for compound 9 recorded in  $\text{CDCl}_3$

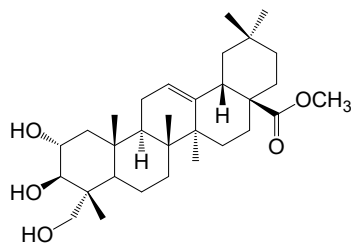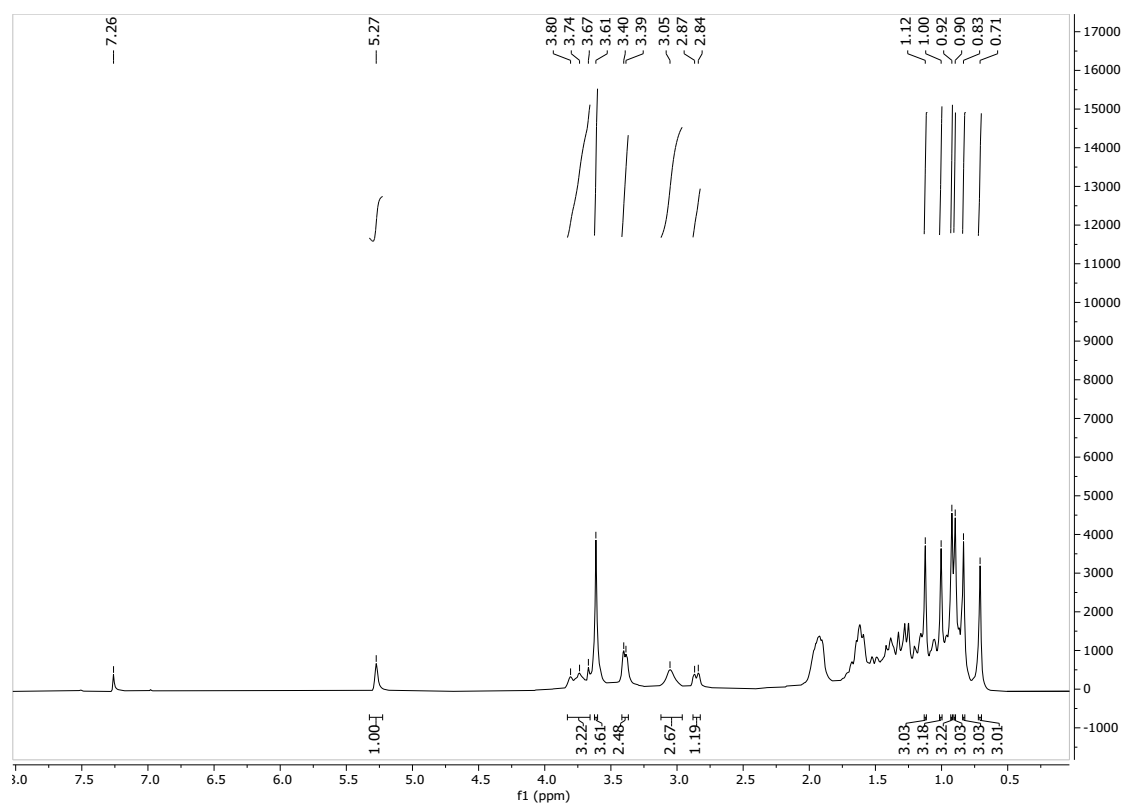

9.2  $^{13}\text{C}$ -NMR spectrum for compound 9 recorded in  $\text{CDCl}_3$

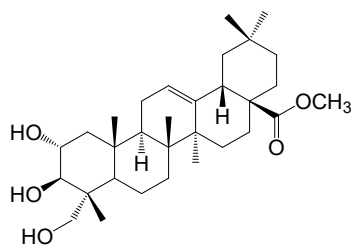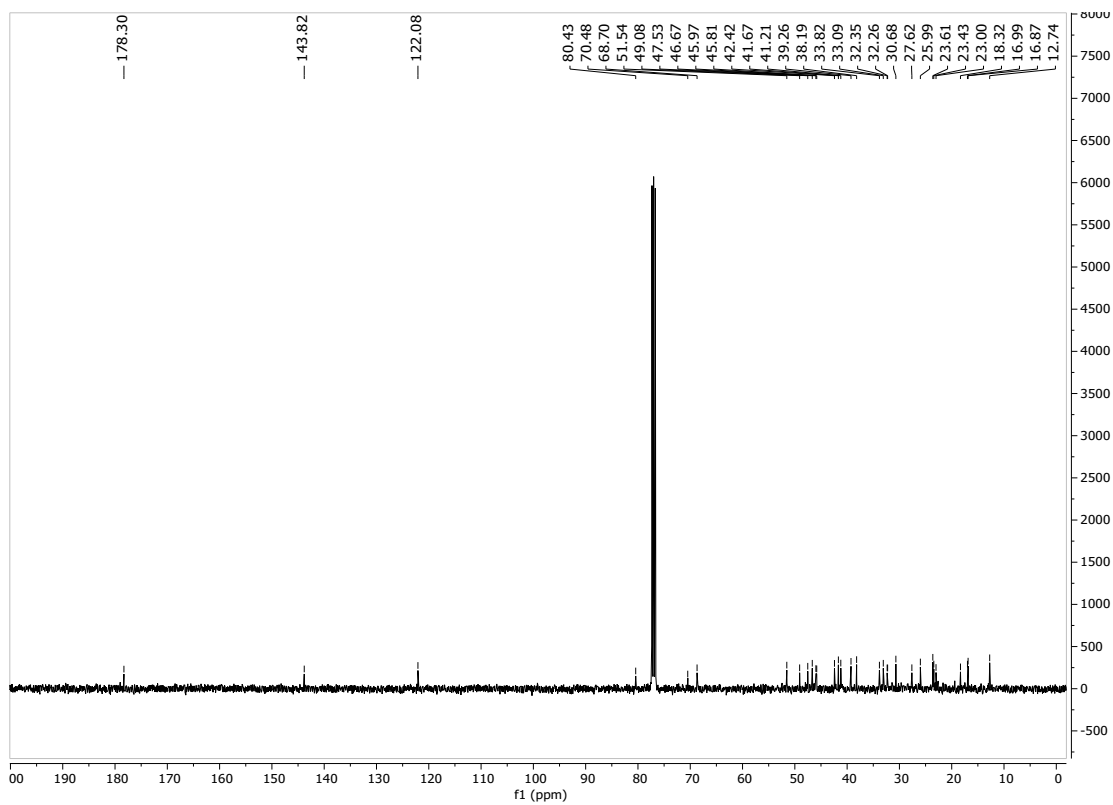

## 10. NMR data for compound 10

### 10.1 <sup>1</sup>H-NMR spectrum for compound 10 recorded in CDCl<sub>3</sub>

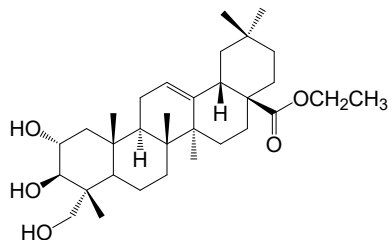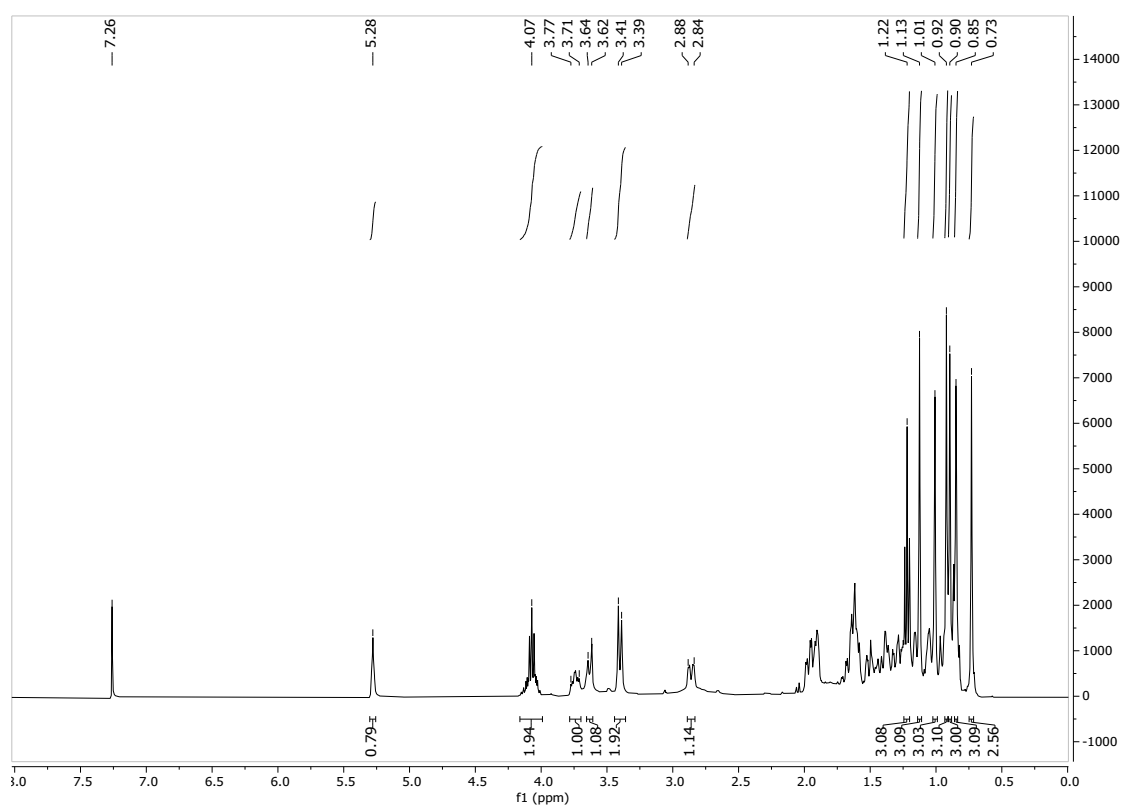

10.2  $^{13}\text{C}$ -NMR spectrum for compound 10 recorded in  $\text{CDCl}_3$

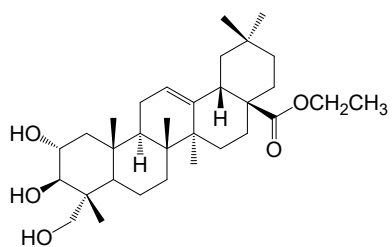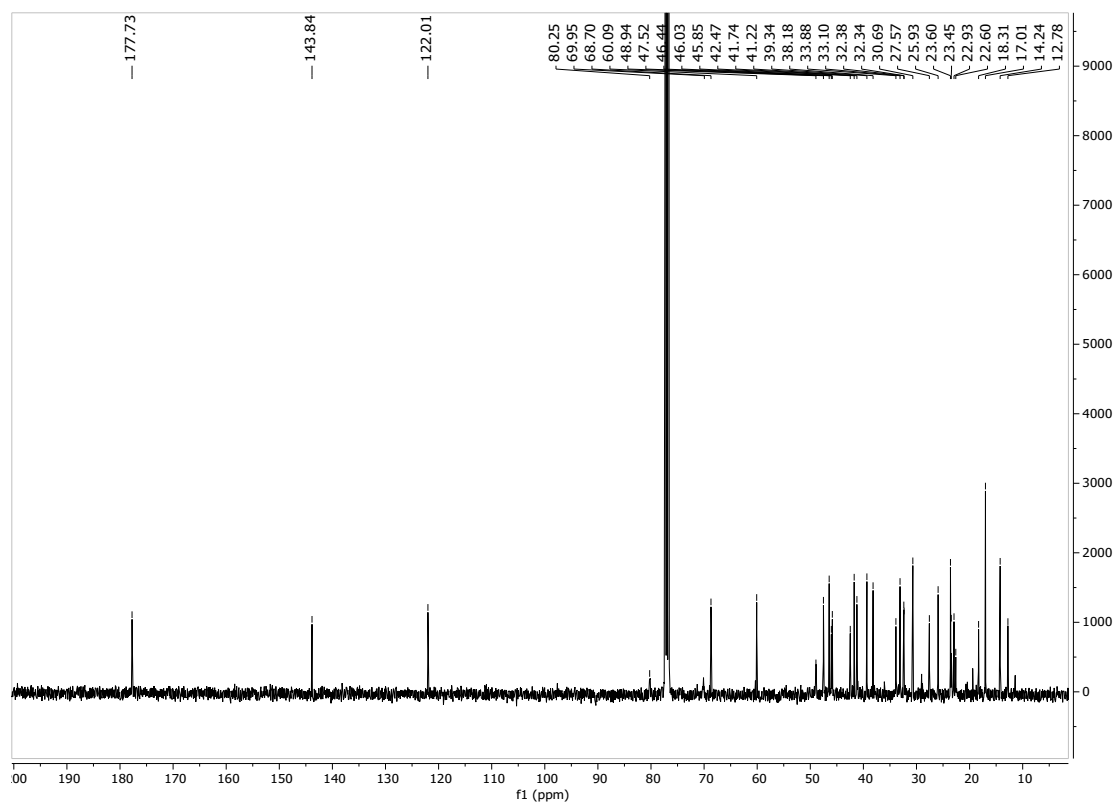



## 11. NMR data for compound 12

### 11.1 <sup>1</sup>H-NMR spectrum for compound 12 recorded in CDCl<sub>3</sub>

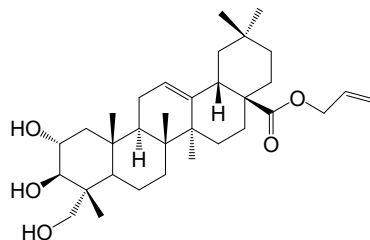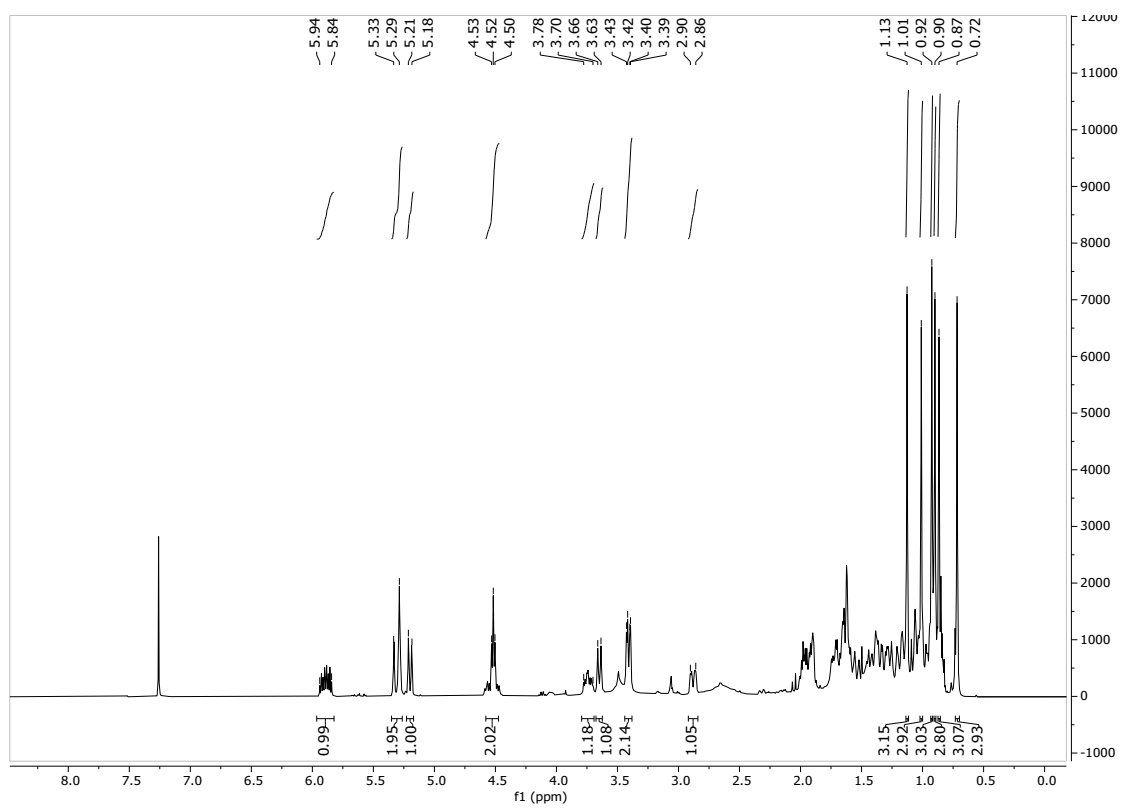

11.2  $^{13}\text{C}$ -NMR spectrum for compound 12 recorded in  $\text{CDCl}_3$

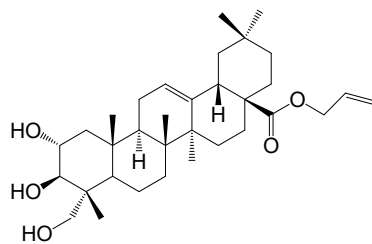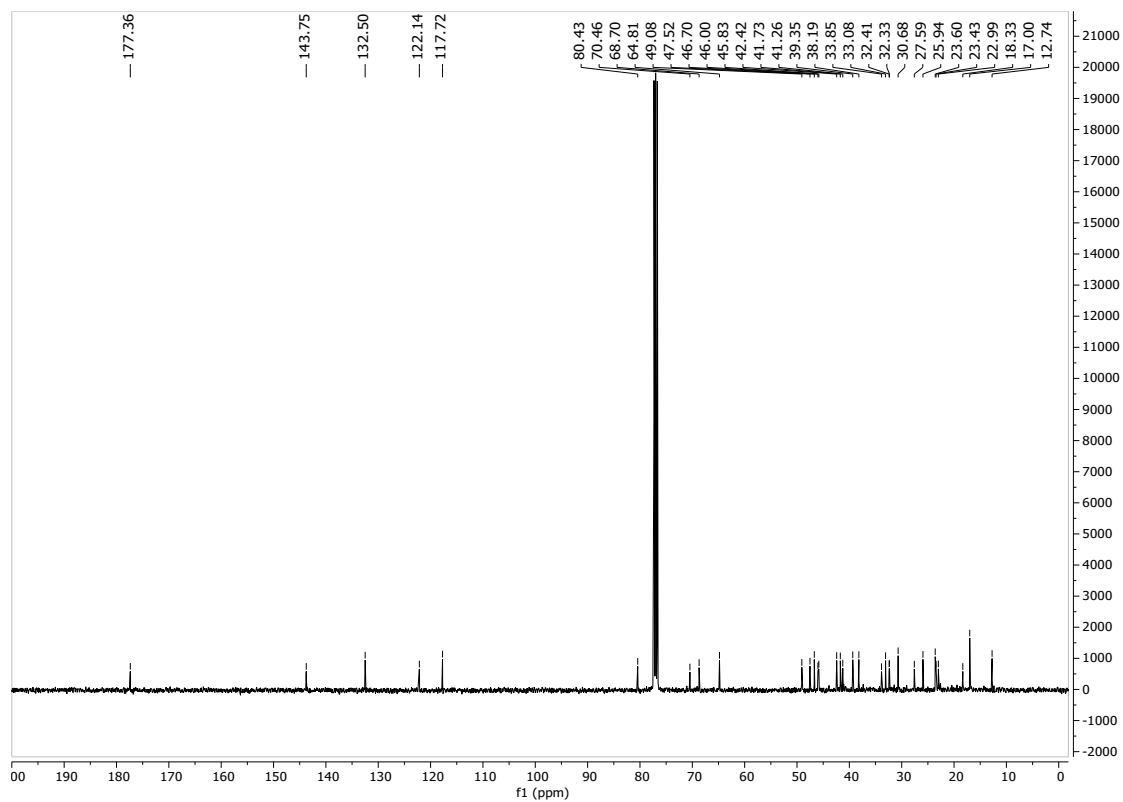

## 12. NMR data for compound 14

### 12.1 <sup>1</sup>H-NMR spectrum for compound 14 recorded in CDCl<sub>3</sub>

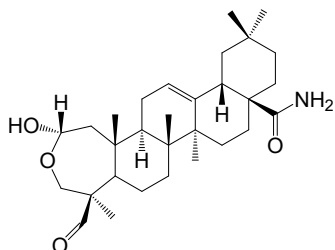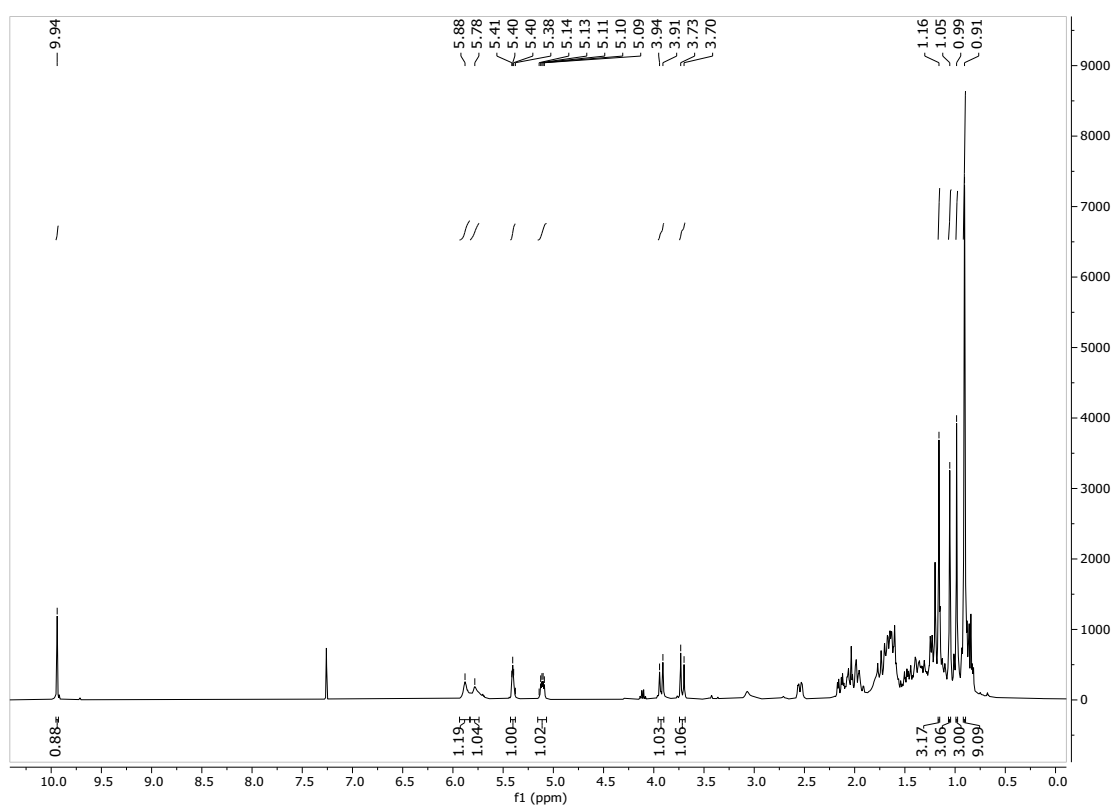

12.2  $^{13}\text{C}$ -NMR spectrum for compound 14 recorded in  $\text{CDCl}_3$

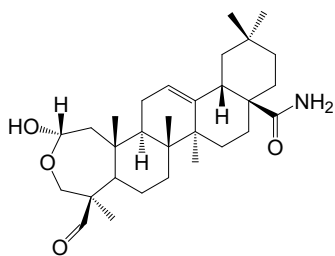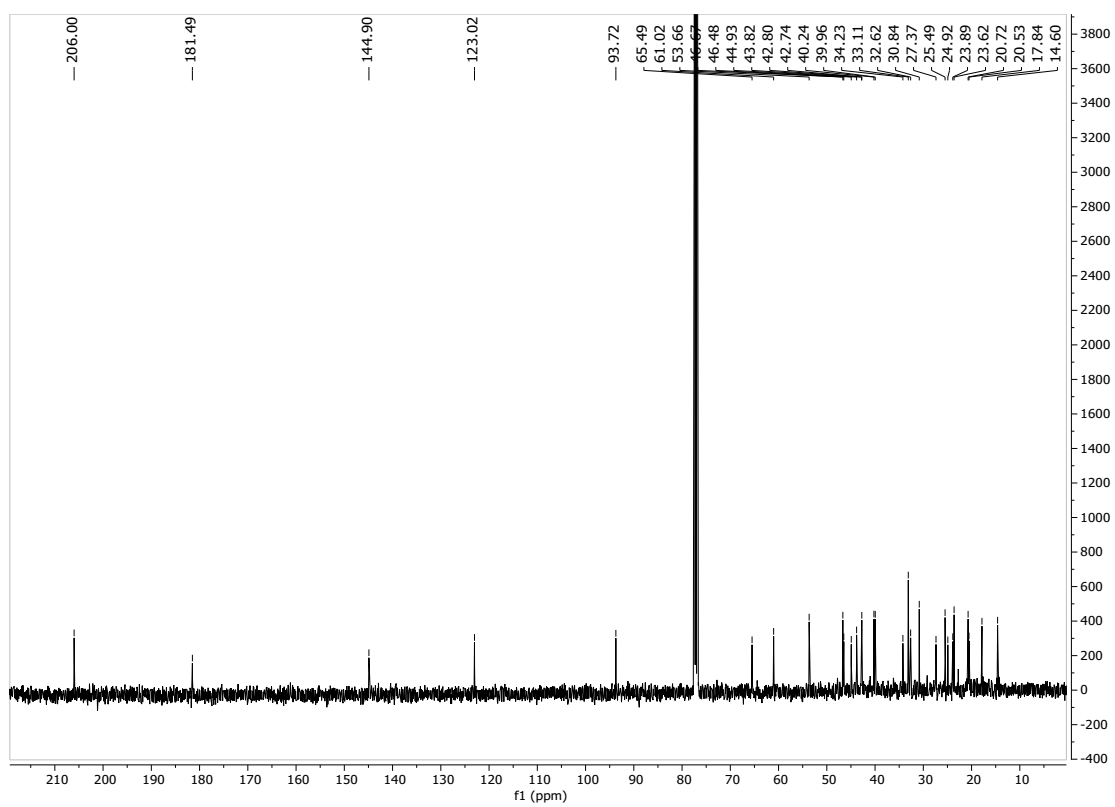

### 13. NMR data for compound 15

13.1  $^1\text{H}$ -NMR spectrum for compound 15 recorded in  $\text{CDCl}_3$

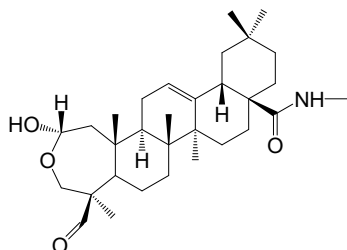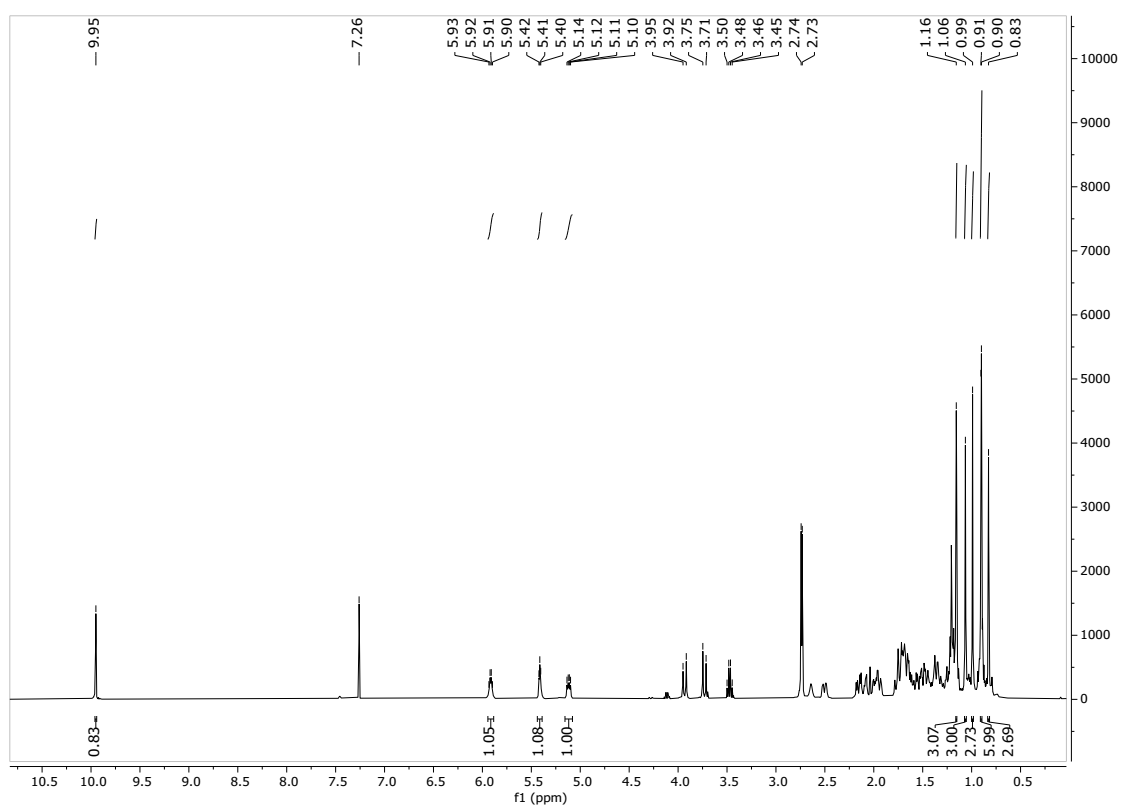

13.2  $^{13}\text{C}$ -NMR spectrum for compound 15 recorded in  $\text{CDCl}_3$

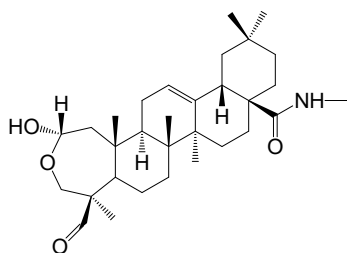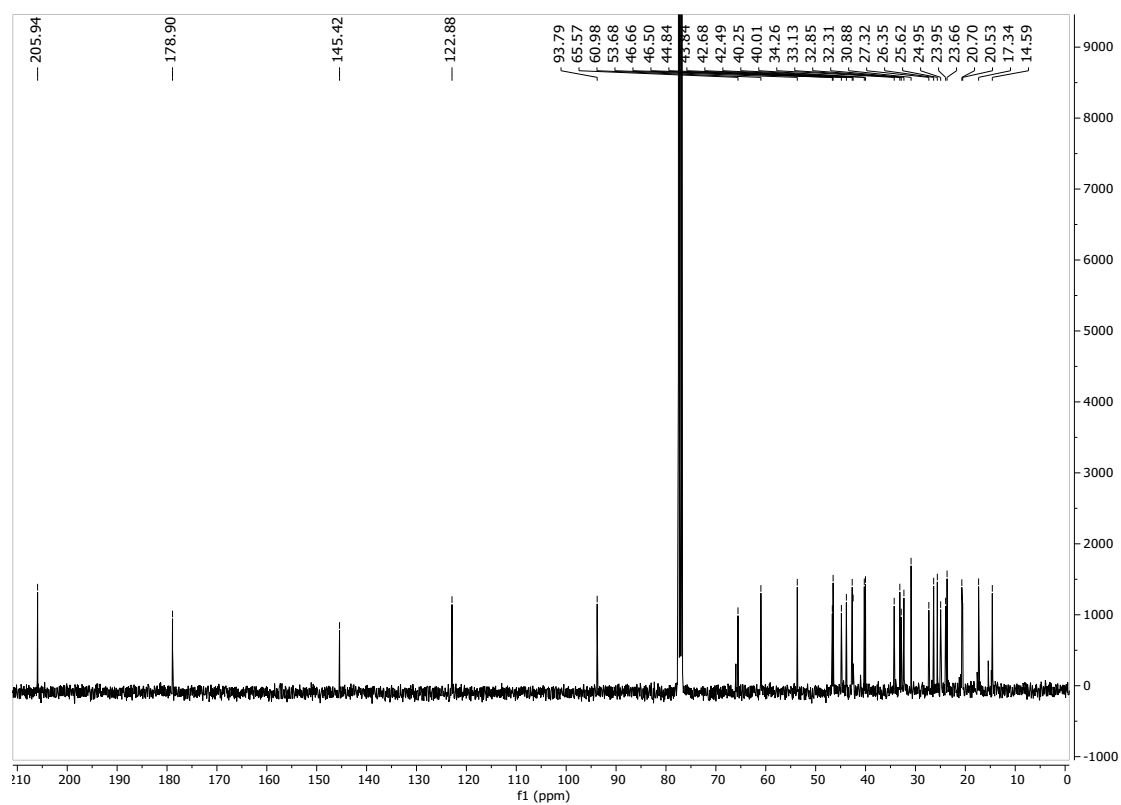

## 14. NMR data for compound 16

### 14.1 <sup>1</sup>H-NMR spectrum for compound 16 recorded in CDCl<sub>3</sub>

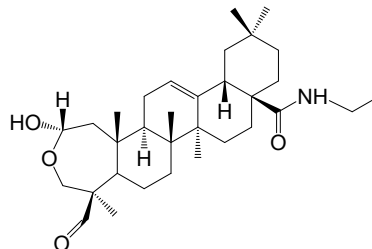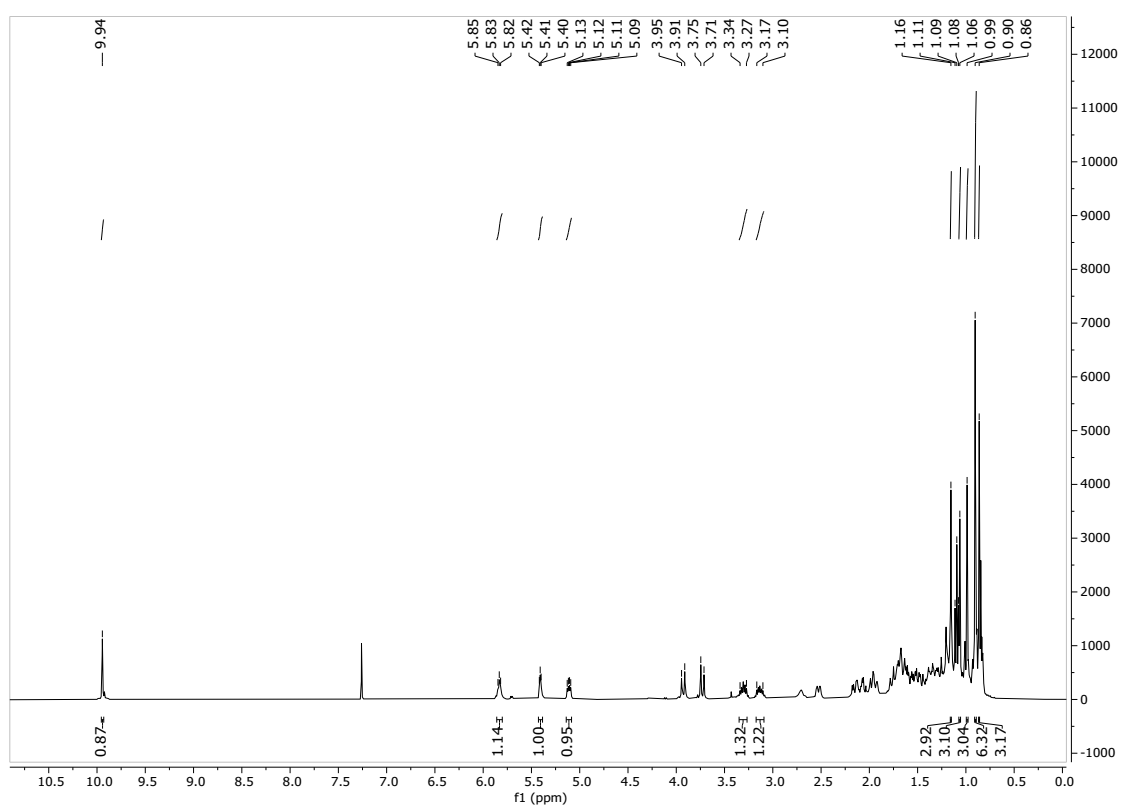

14.2  $^{13}\text{C}$ -NMR spectrum for compound 16 recorded in  $\text{CDCl}_3$

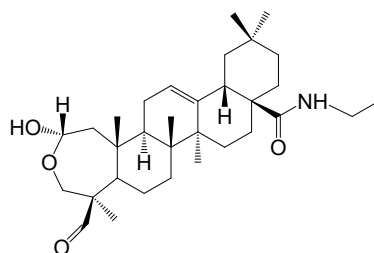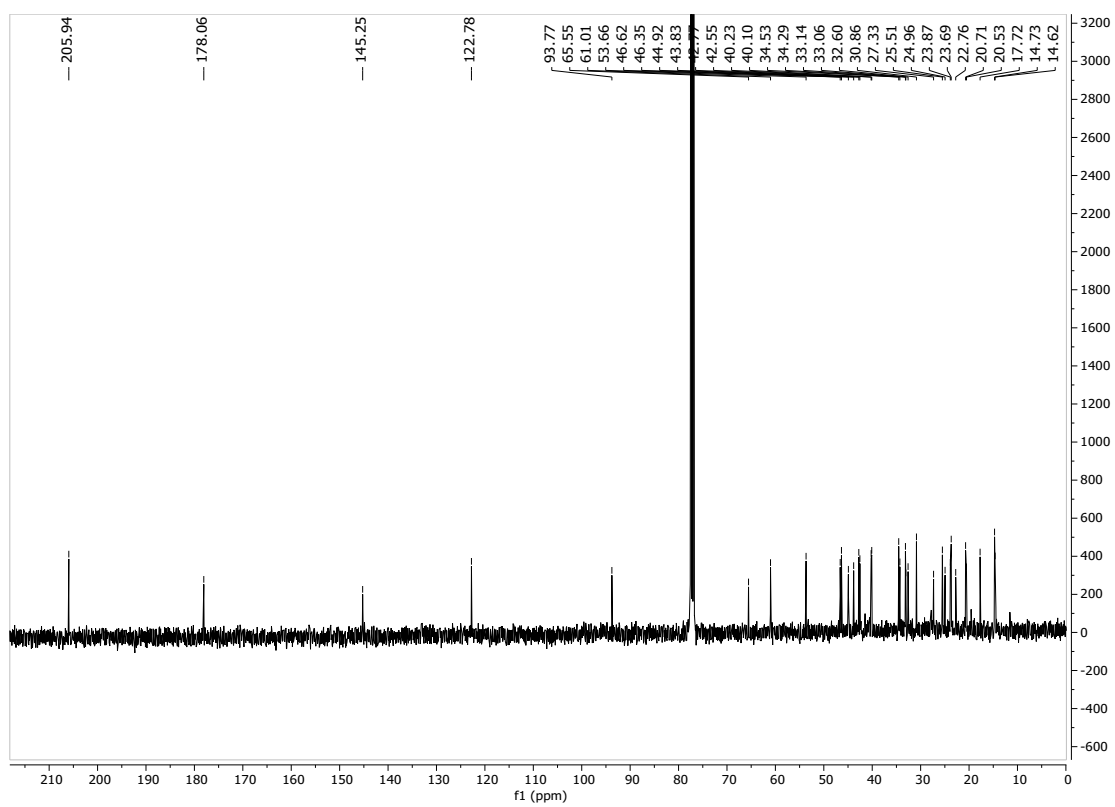



## 15. NMR data for compound 17

15.1  $^1\text{H}$ -NMR spectrum for compound 17 recorded in  $\text{CDCl}_3$

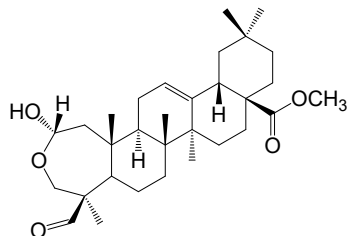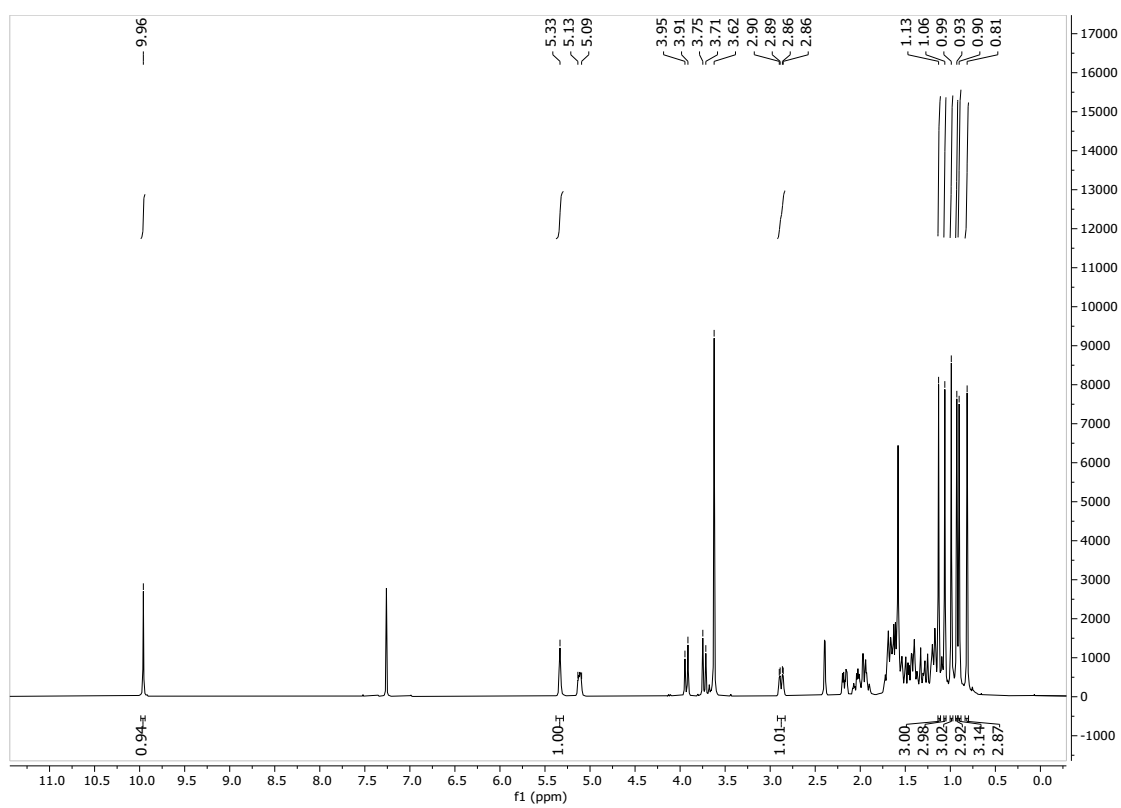

15.2  $^{13}\text{C}$ -NMR spectrum for compound 17 recorded in  $\text{CDCl}_3$

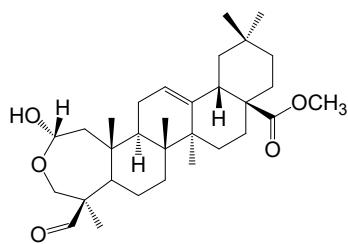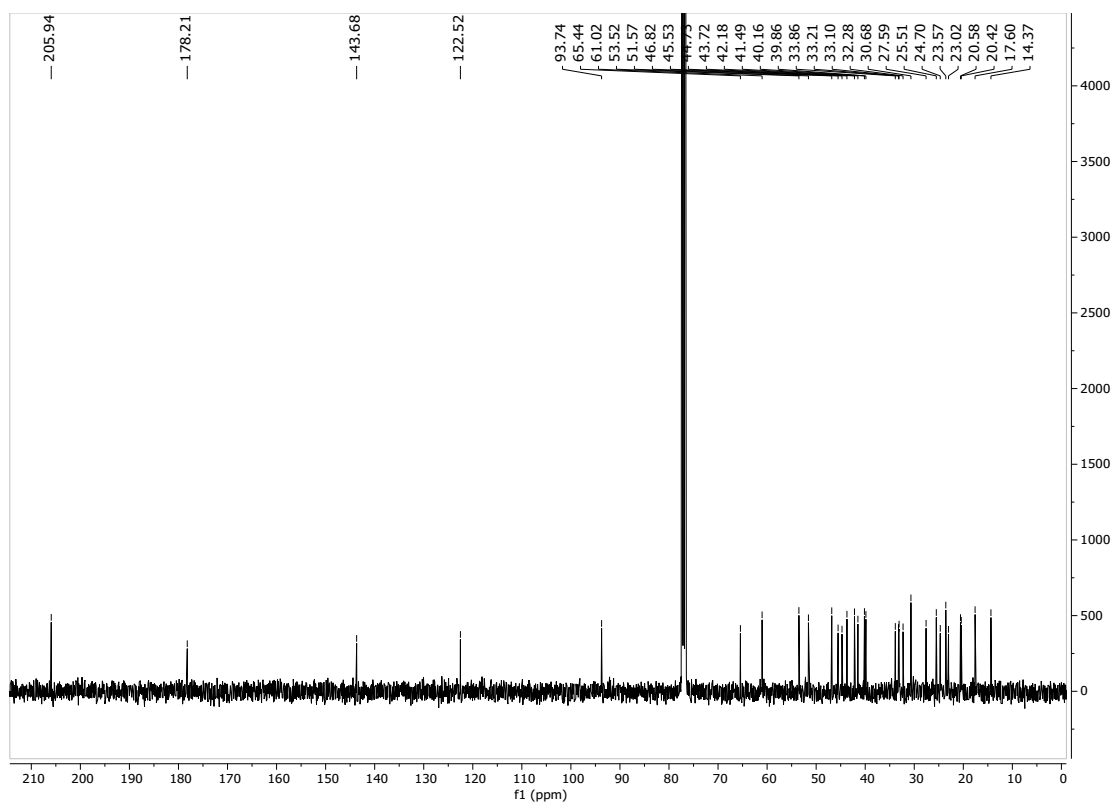

## 16. NMR data for compound 18

### 16.1 $^1\text{H}$ -NMR spectrum for compound 18 recorded in $\text{CDCl}_3$

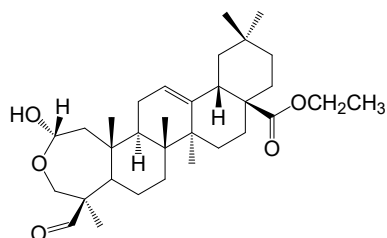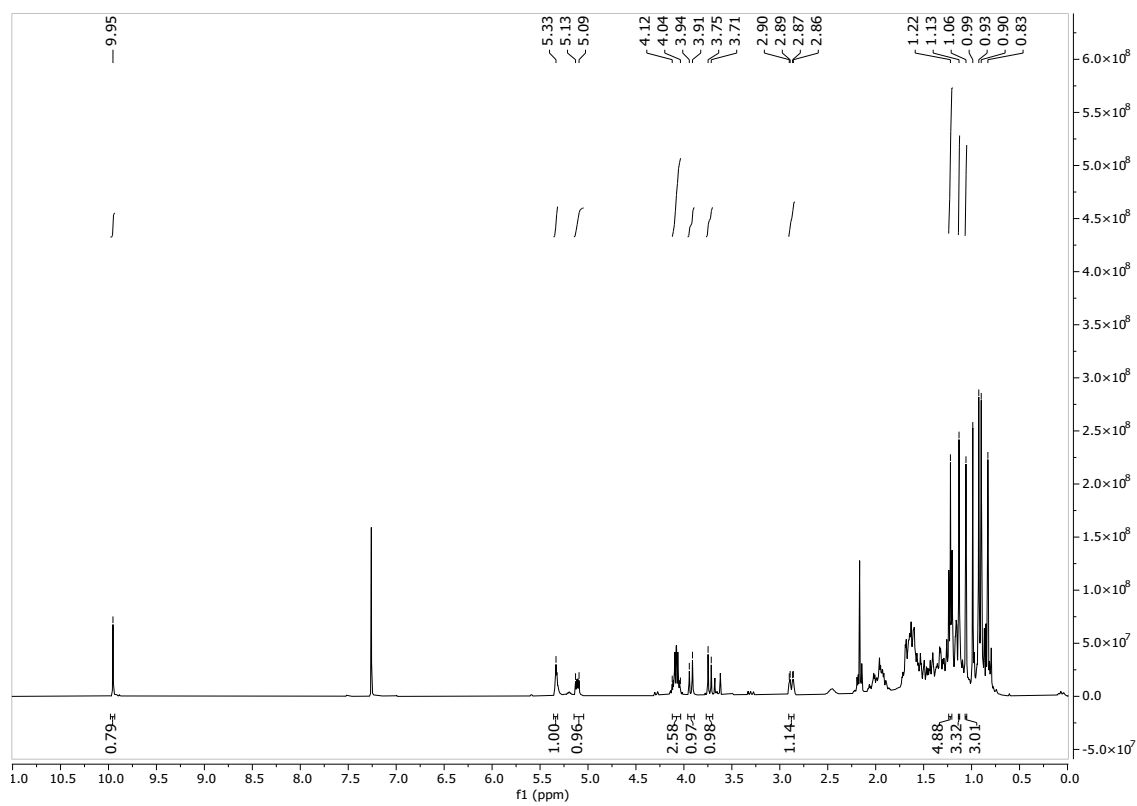

16.2  $^{13}\text{C}$ -NMR spectrum for compound 18 recorded in  $\text{CDCl}_3$

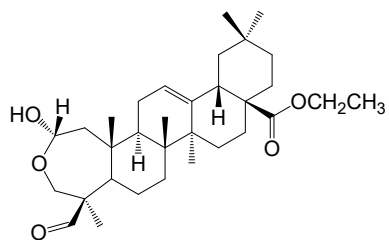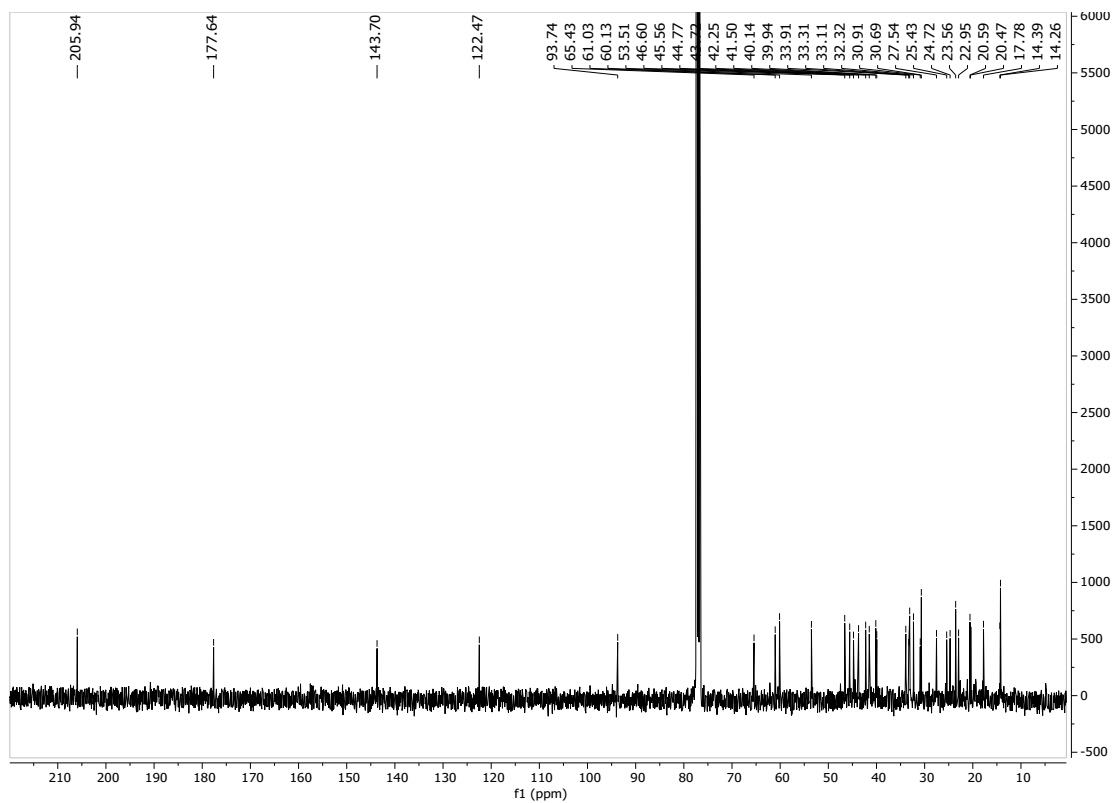

## 17. NMR data for compound 19

17.1 <sup>1</sup>H-NMR spectrum for compound 19 recorded in CDCl<sub>3</sub>

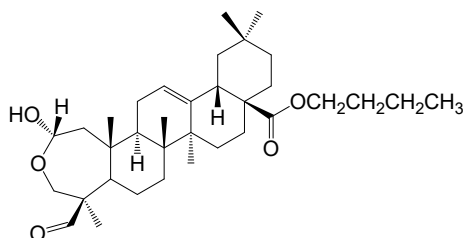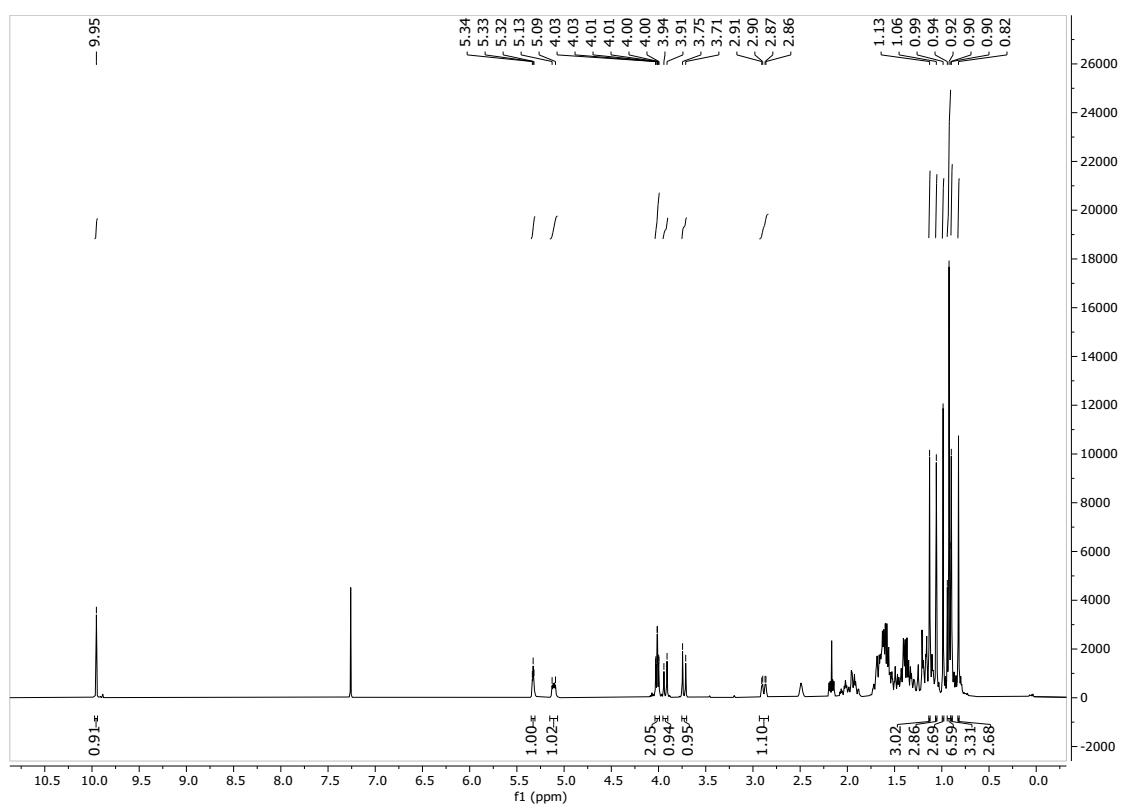

17.2  $^{13}\text{C}$ -NMR spectrum for compound 19 recorded in  $\text{CDCl}_3$

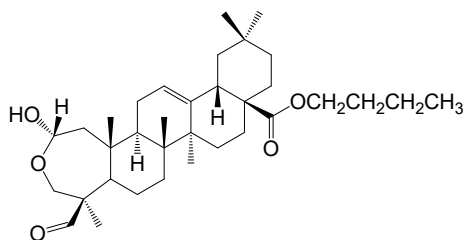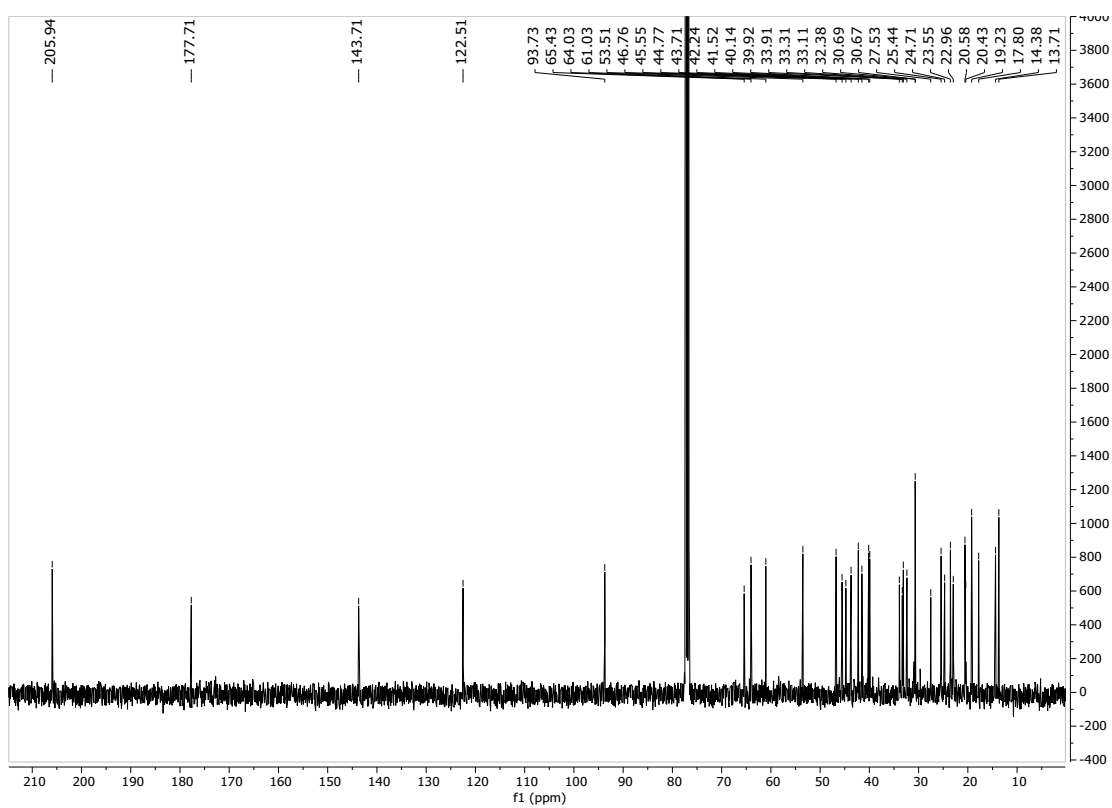

## 18. NMR data for compound 20

18.1 <sup>1</sup>H-NMR spectrum for compound 20 recorded in CDCl<sub>3</sub>

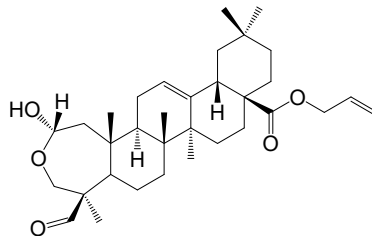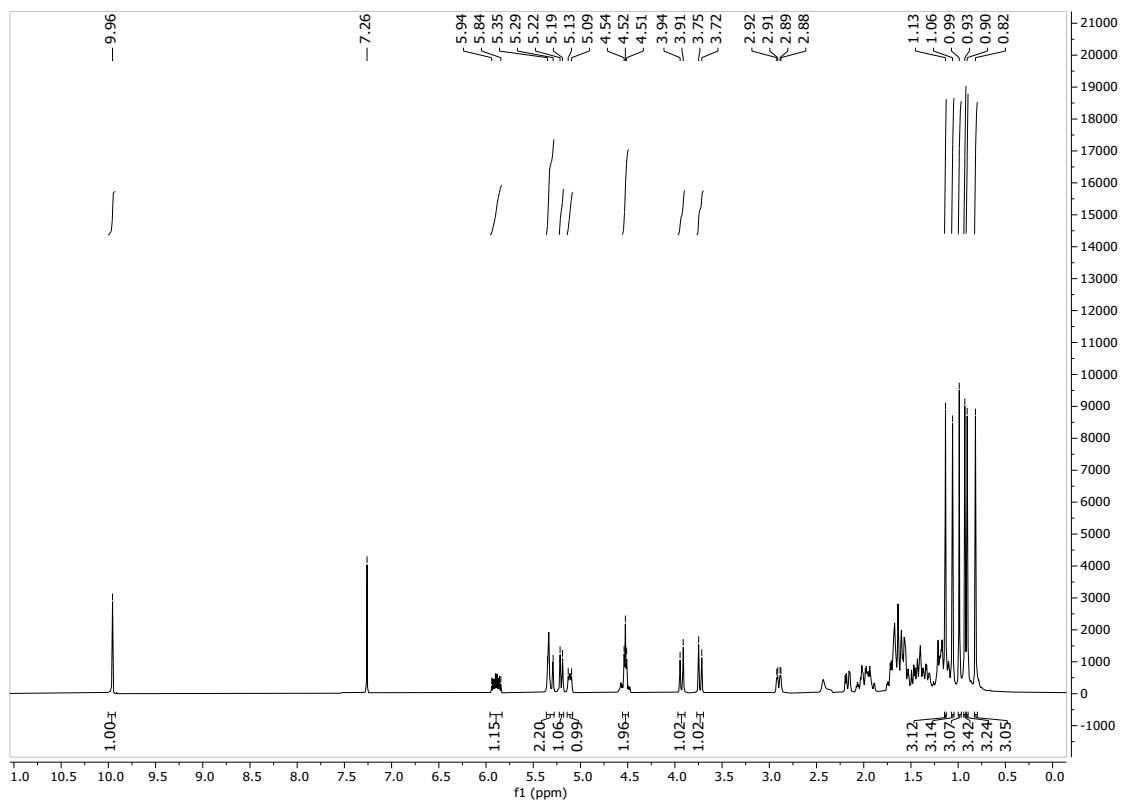

18.2  $^{13}\text{C}$ -NMR spectrum for compound 20 recorded in  $\text{CDCl}_3$

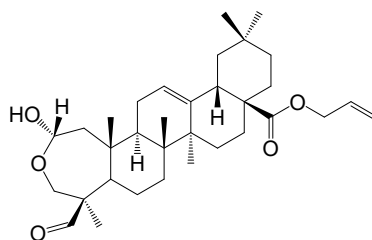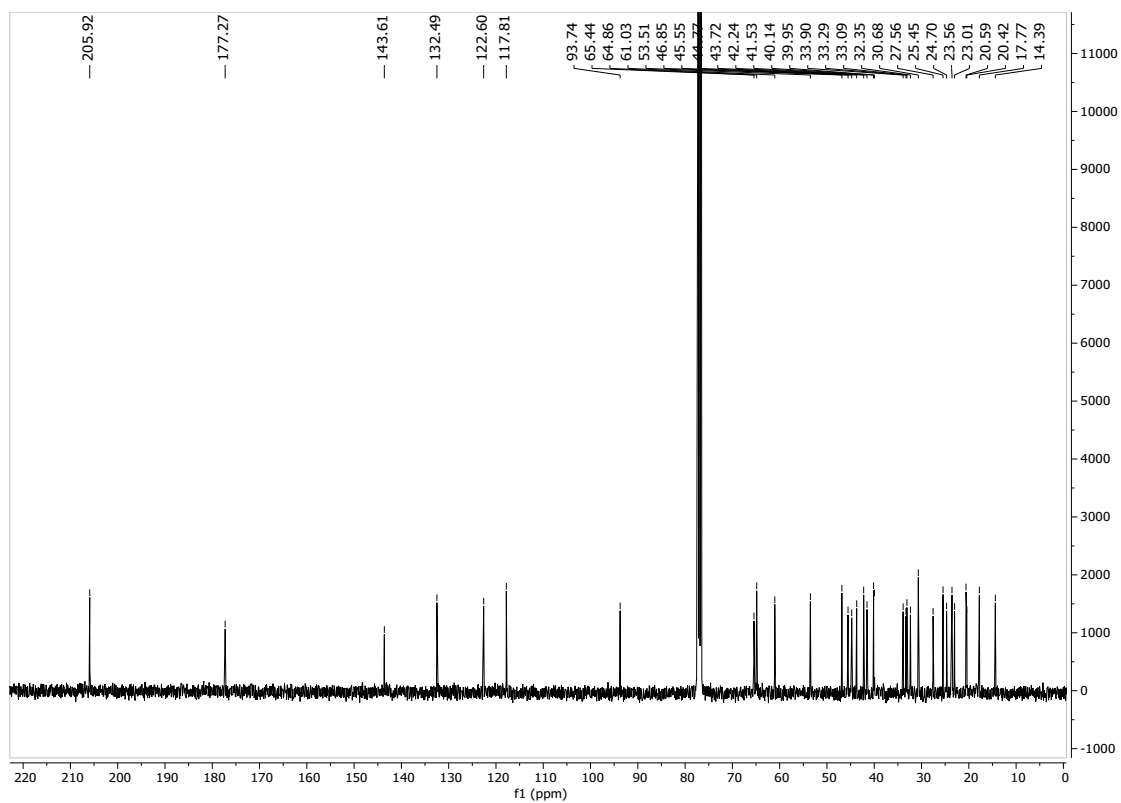



18.3 COSY spectrum for compound 20 recorded in CDCl<sub>3</sub>

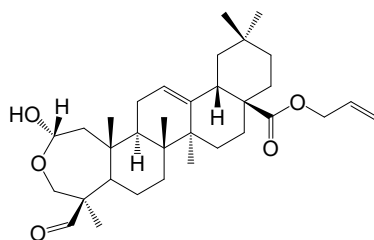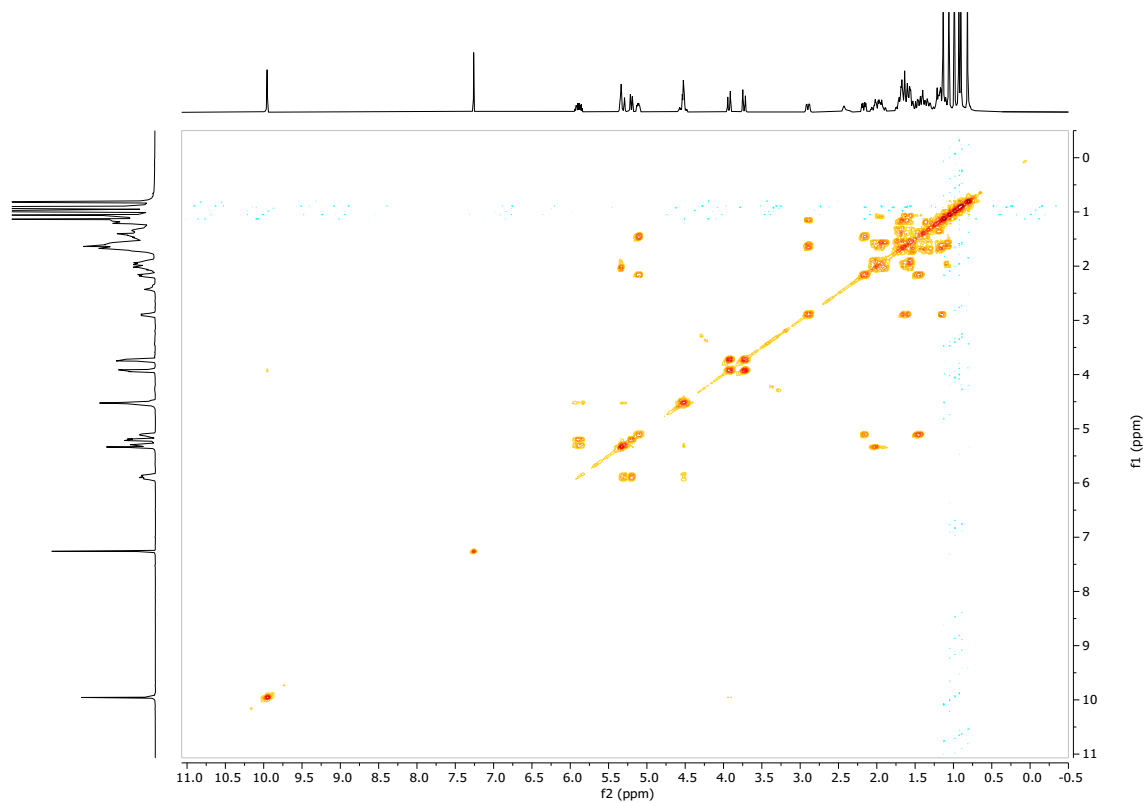

18.4 NOESY spectrum for compound 20 recorded in CDCl<sub>3</sub>

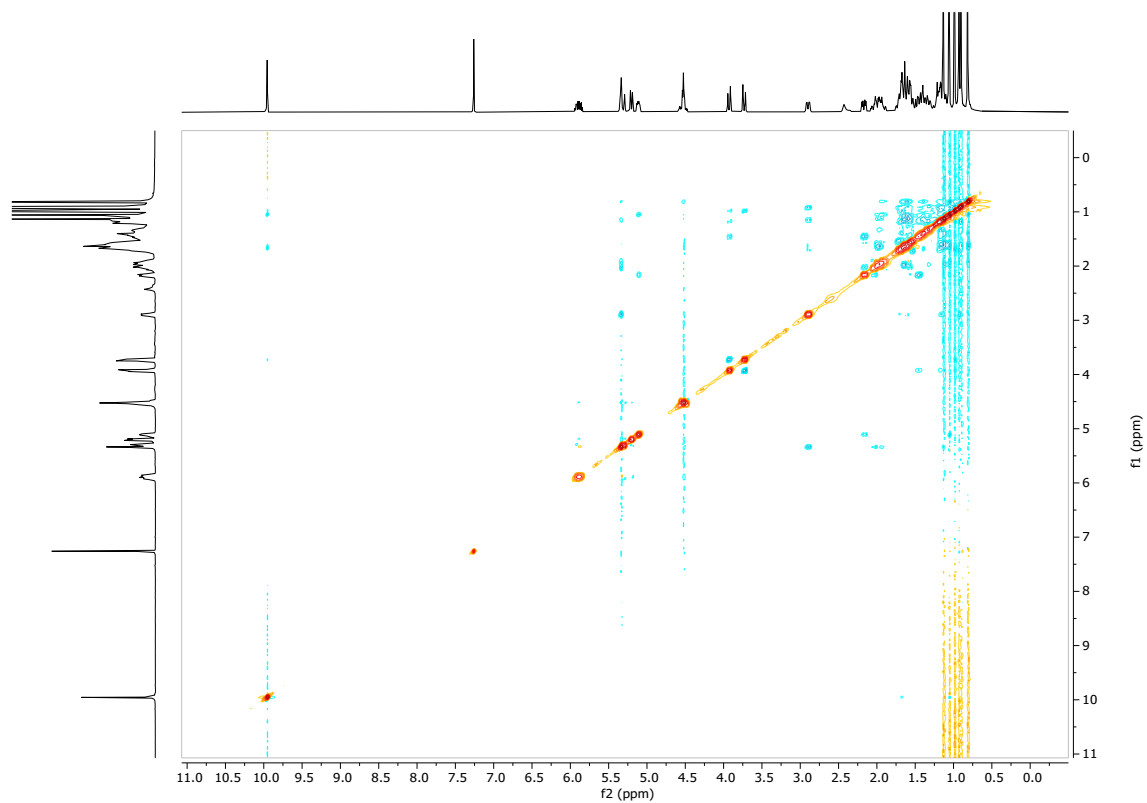

18.4 HSQC spectrum for compound 20 recorded in CDCl<sub>3</sub>

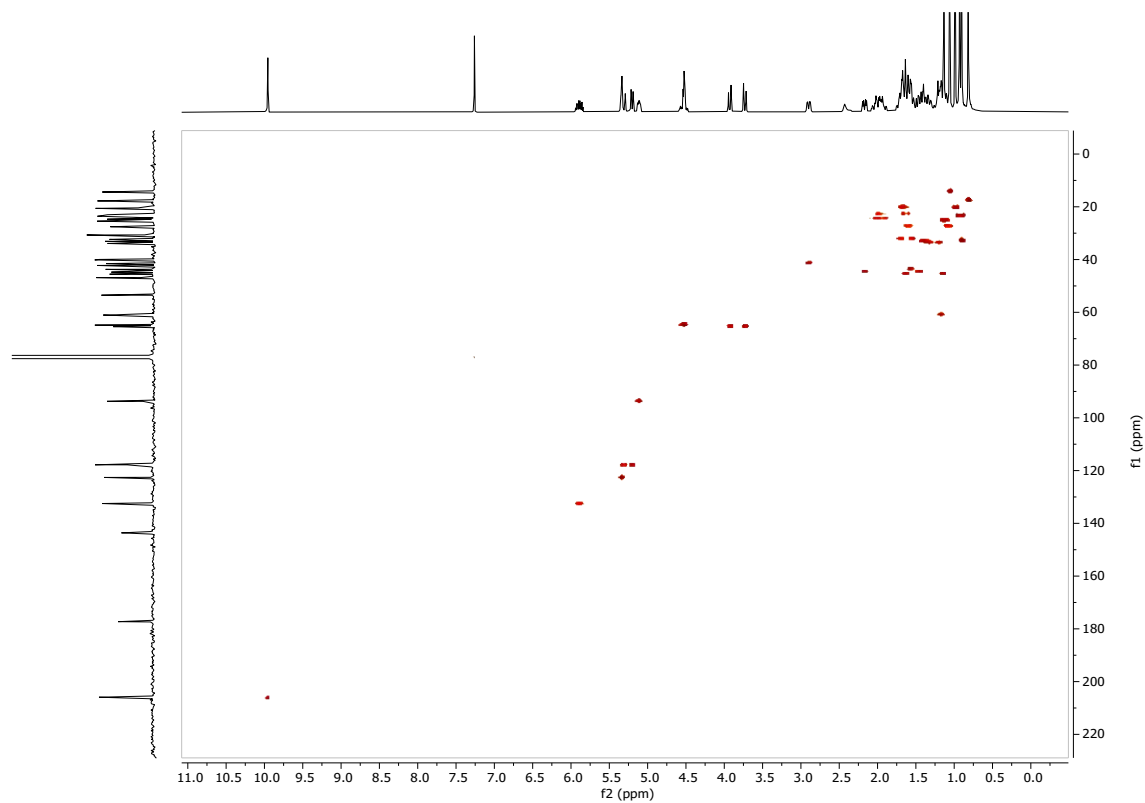

18.4 HMBC spectrum for compound 20 recorded in CDCl<sub>3</sub>

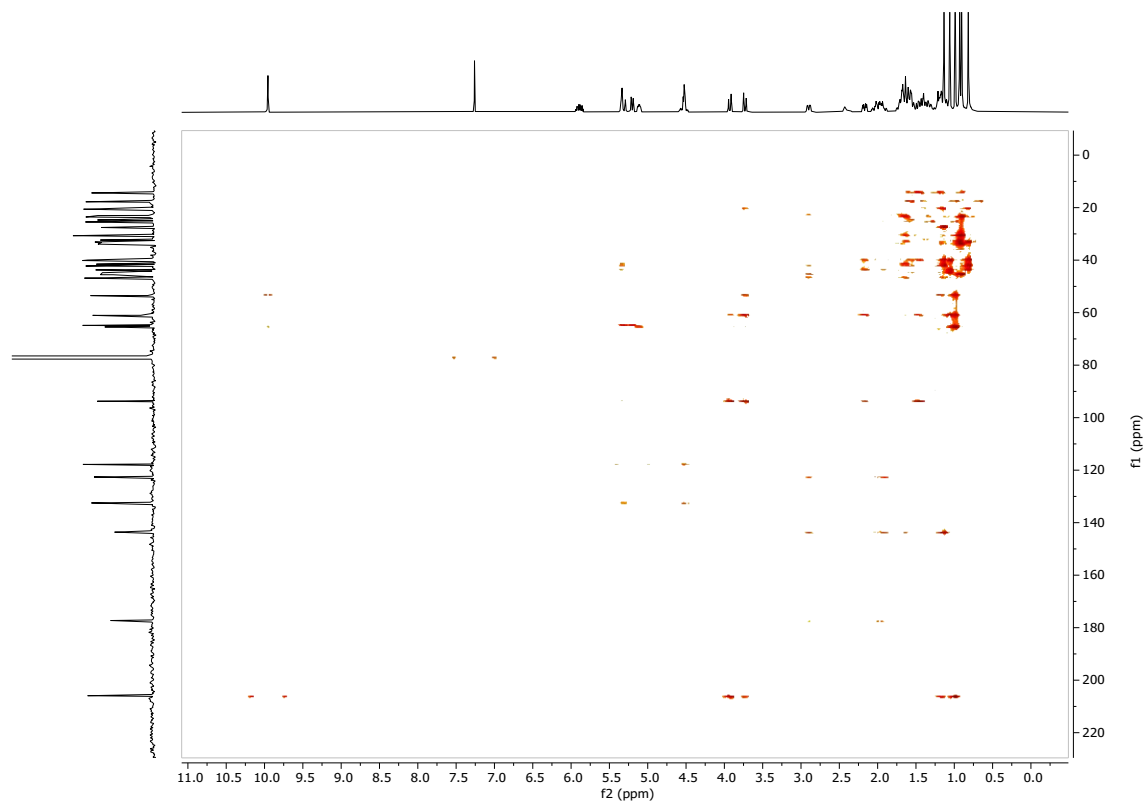

## 19. NMR data for compound 22

19.1  $^1\text{H}$ -NMR spectrum for compound 22 recorded in  $\text{CDCl}_3$

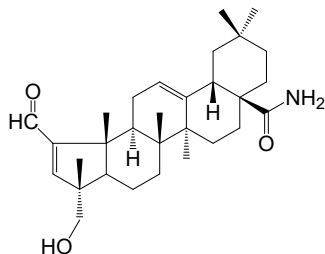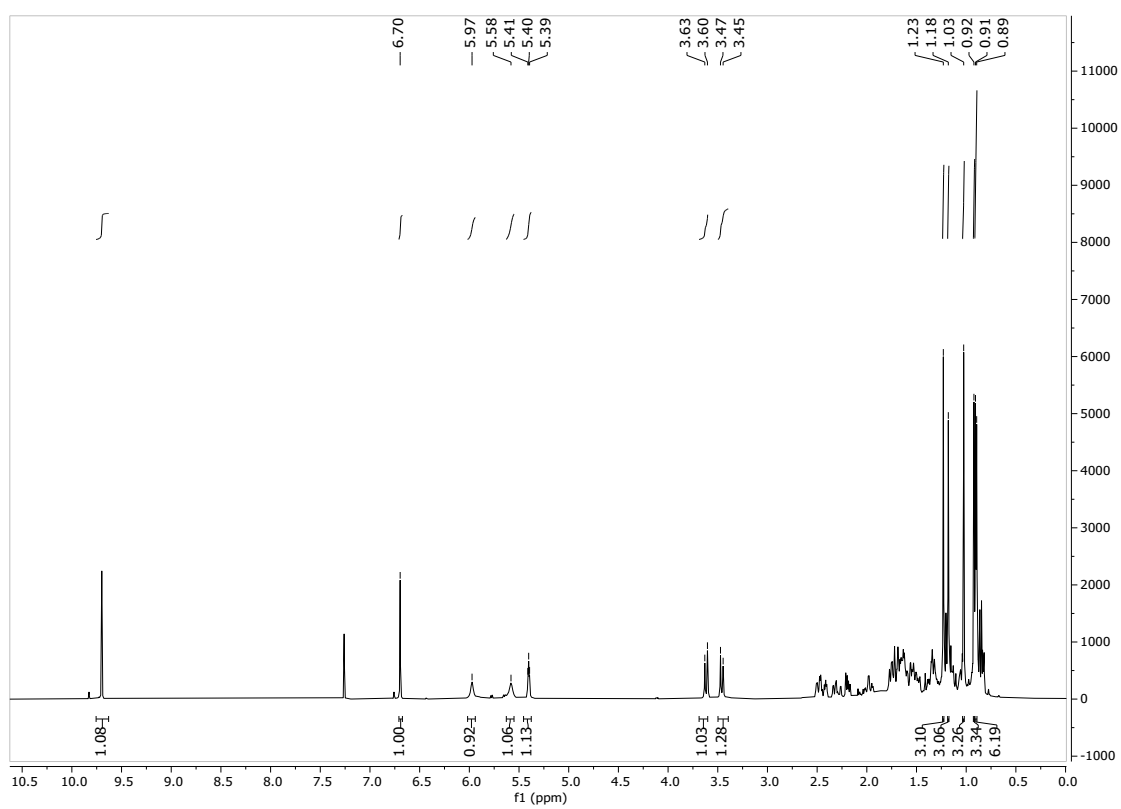

19.2  $^{13}\text{C}$ -NMR spectrum for compound 22 recorded in  $\text{CDCl}_3$

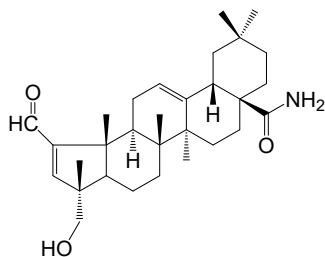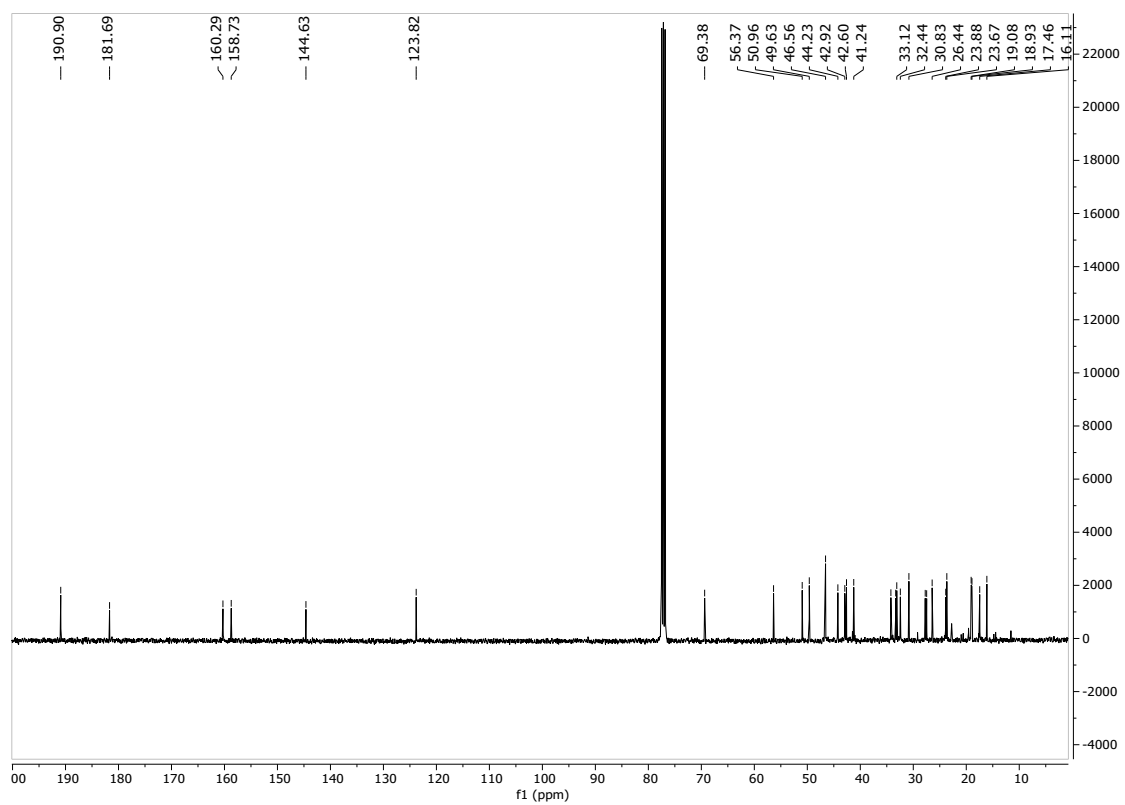

## 20. NMR data for compound 23

### 20.1 <sup>1</sup>H-NMR spectrum for compound 23 recorded in CDCl<sub>3</sub>

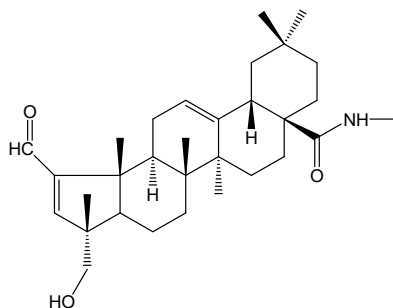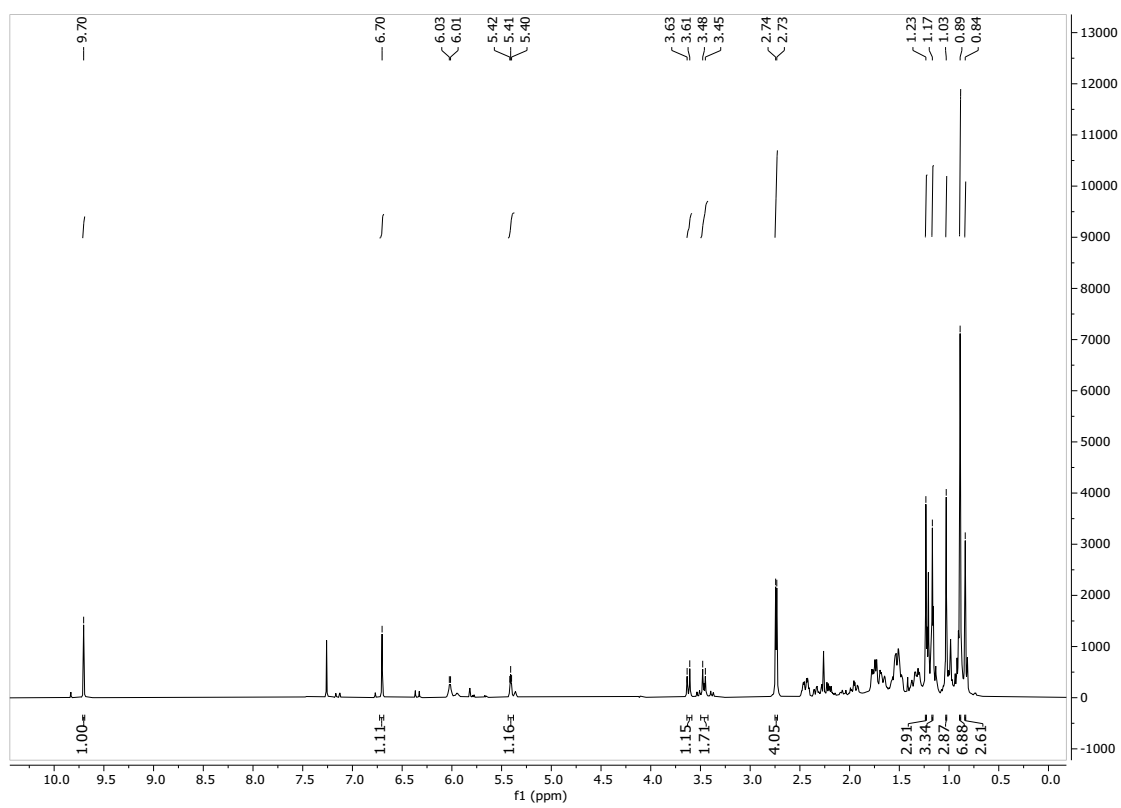

20.2  $^{13}\text{C}$ -NMR spectrum for compound 23 recorded in  $\text{CDCl}_3$

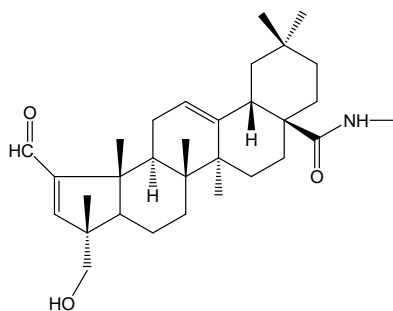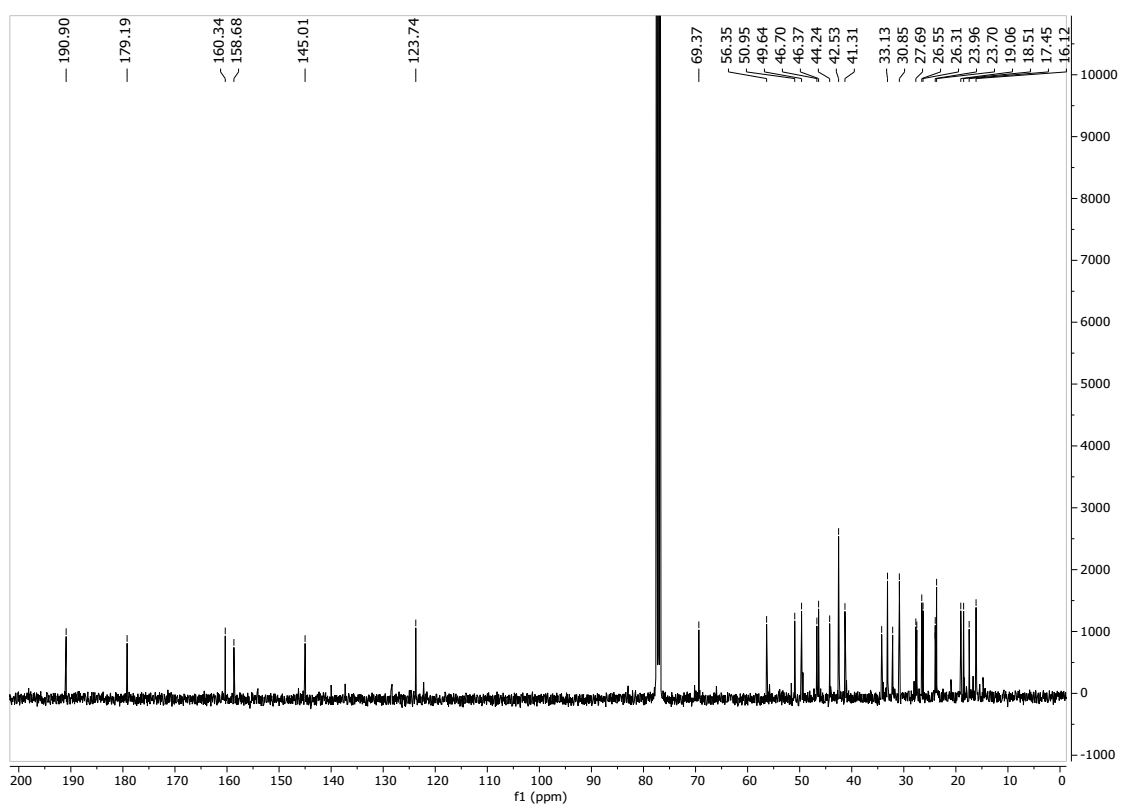



## 21. NMR data for compound 24

### 21.1 <sup>1</sup>H-NMR spectrum for compound 24 recorded in CDCl<sub>3</sub>

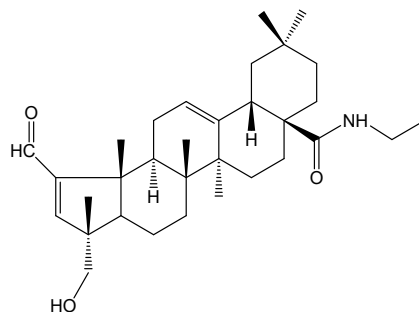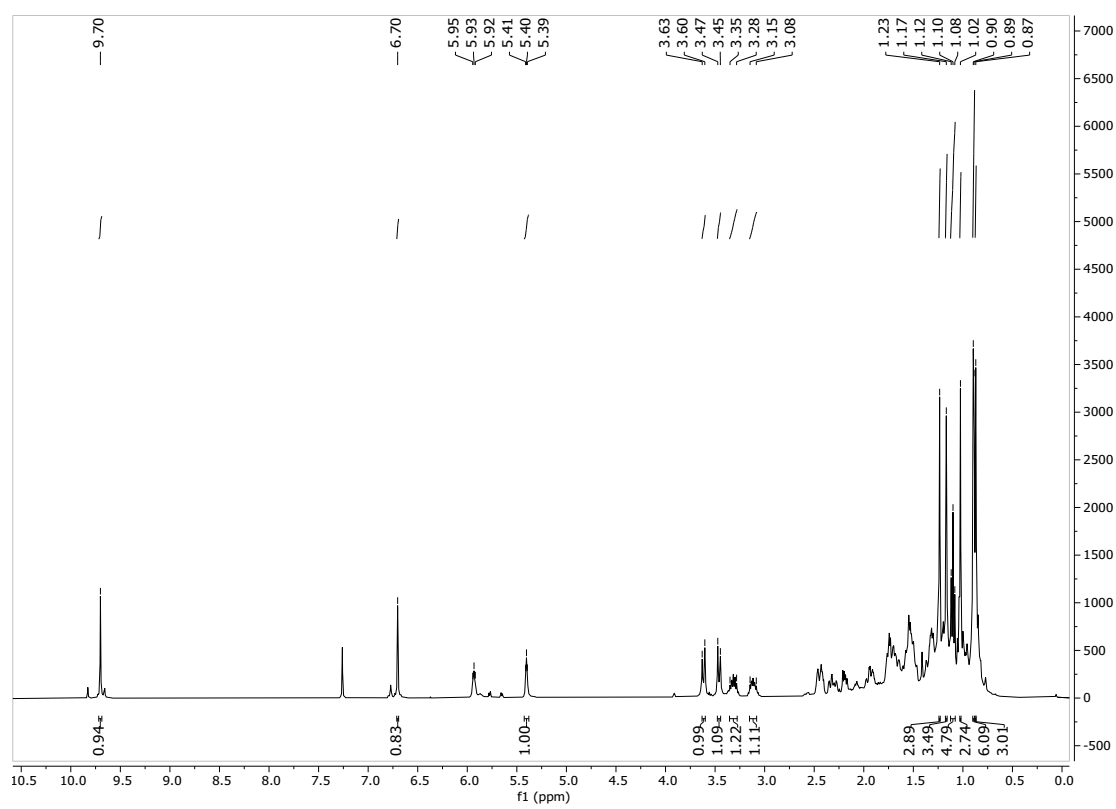

21.2  $^{13}\text{C}$ -NMR spectrum for compound 24 recorded in  $\text{CDCl}_3$

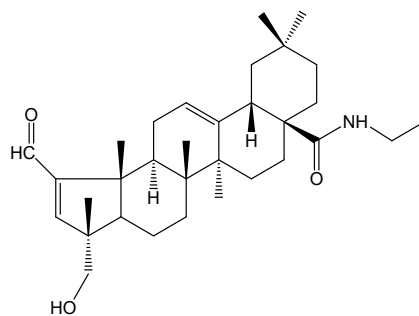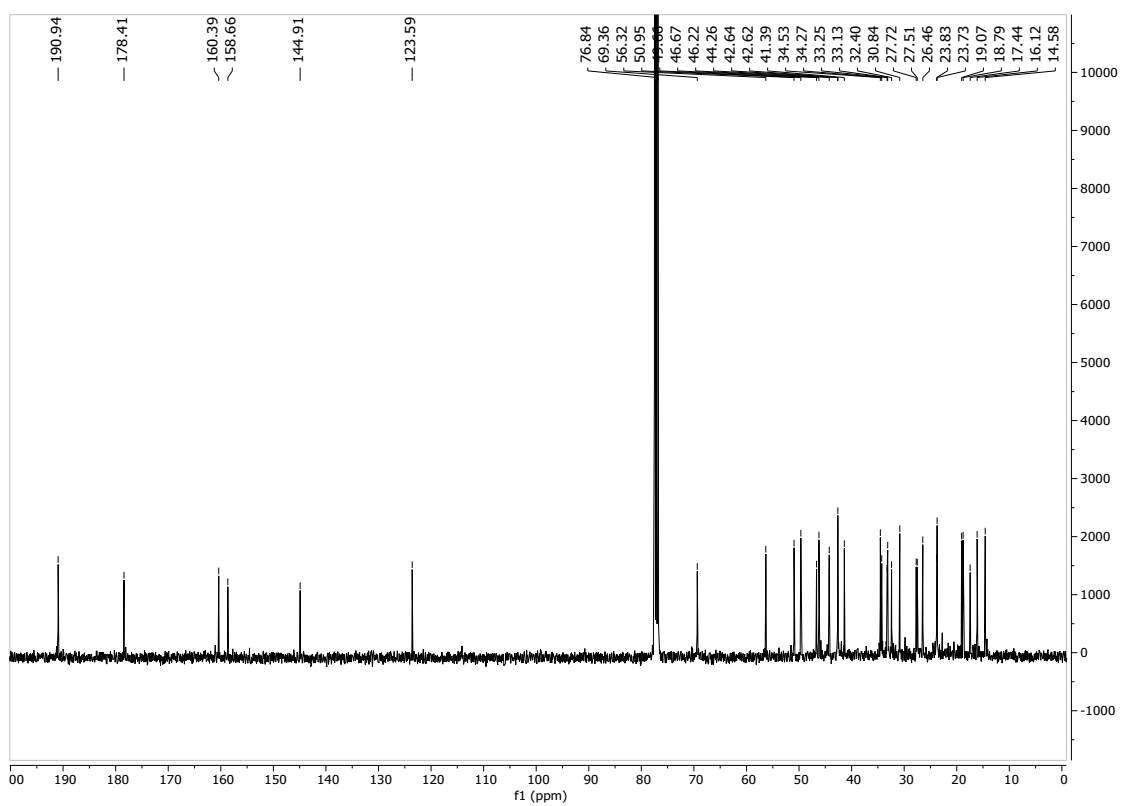

## 22. NMR data for compound 25

### 22.1 <sup>1</sup>H-NMR spectrum for compound 25 recorded in CDCl<sub>3</sub>

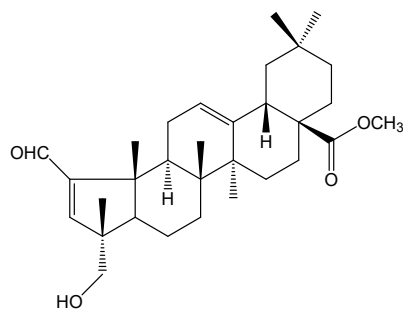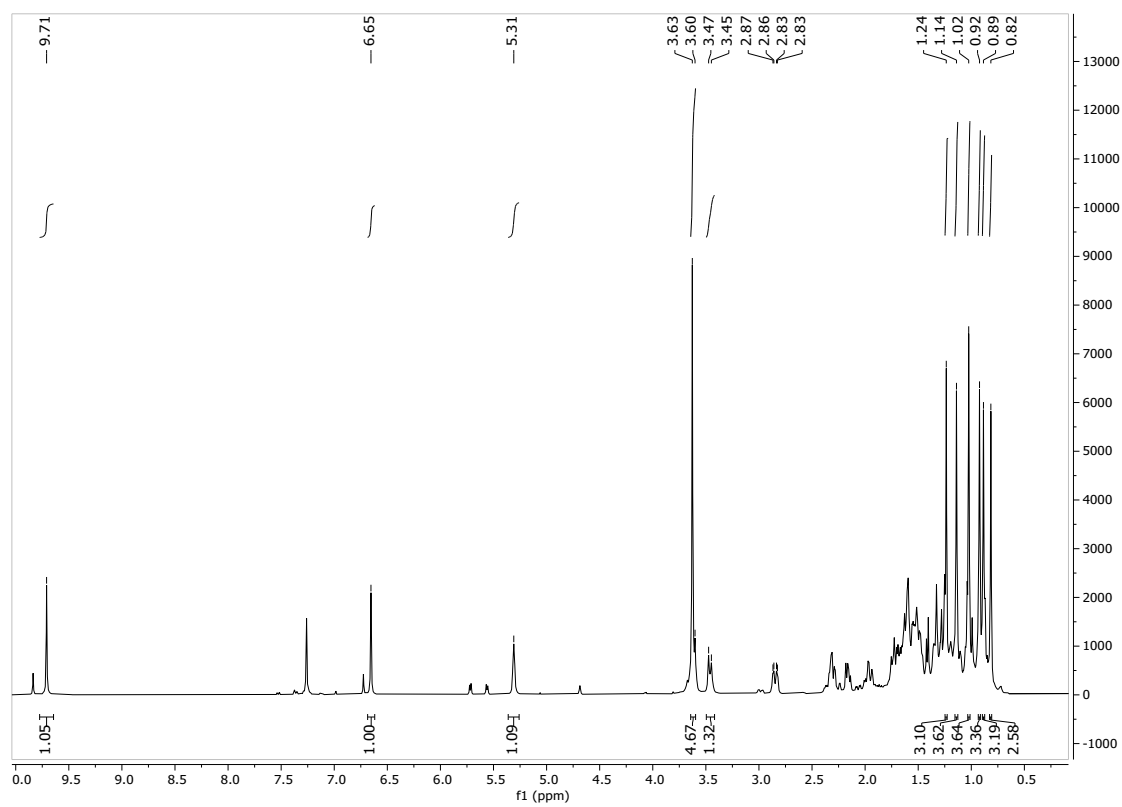

22.2  $^{13}\text{C}$ -NMR spectrum for compound 25 recorded in  $\text{CDCl}_3$

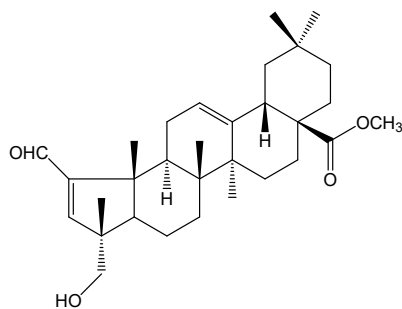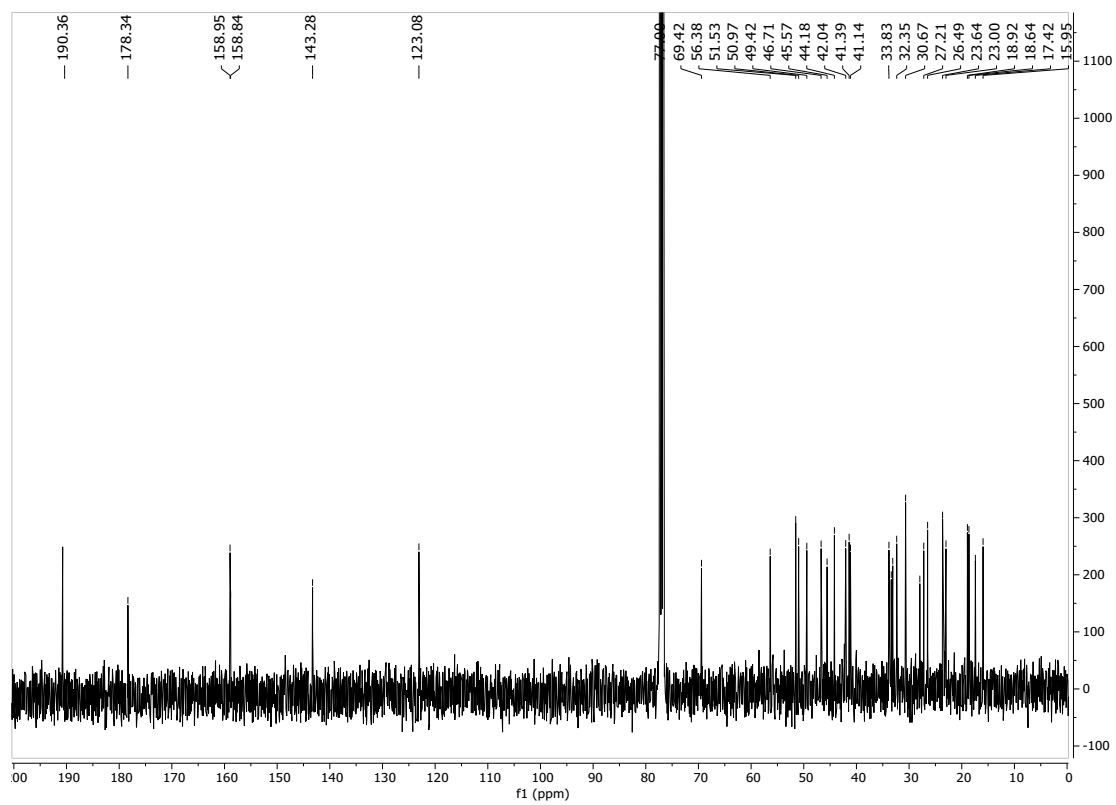

## 23. NMR data for compound 26

### 23.1 $^1\text{H}$ -NMR spectrum for compound 26 recorded in $\text{CDCl}_3$

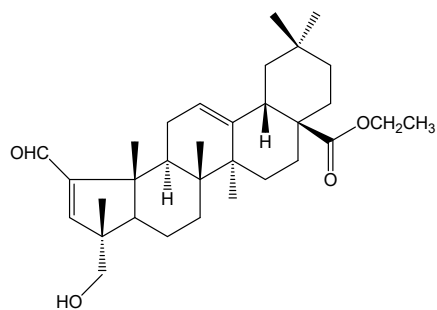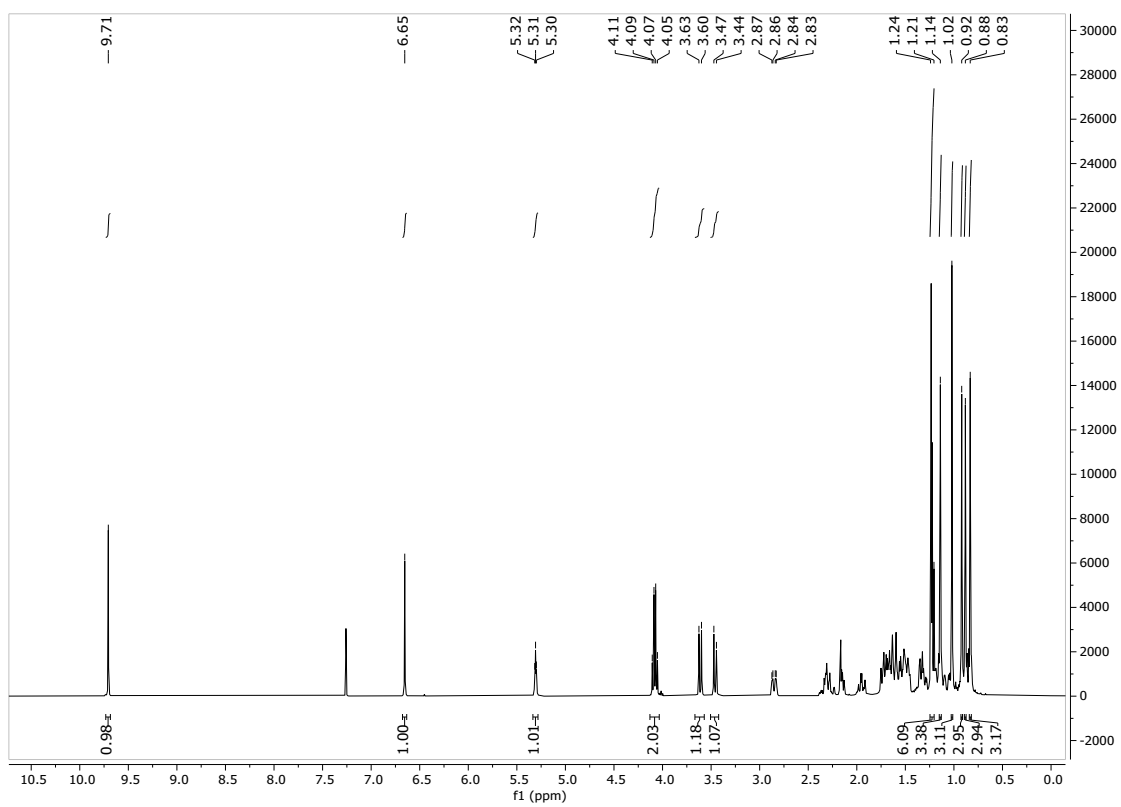

23.2  $^{13}\text{C}$ -NMR spectrum for compound 26 recorded in  $\text{CDCl}_3$

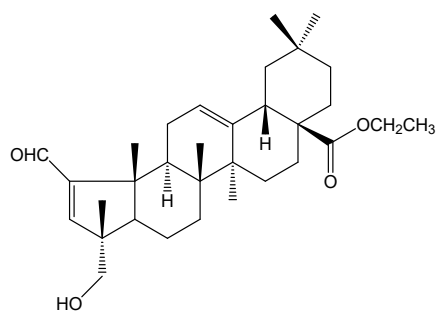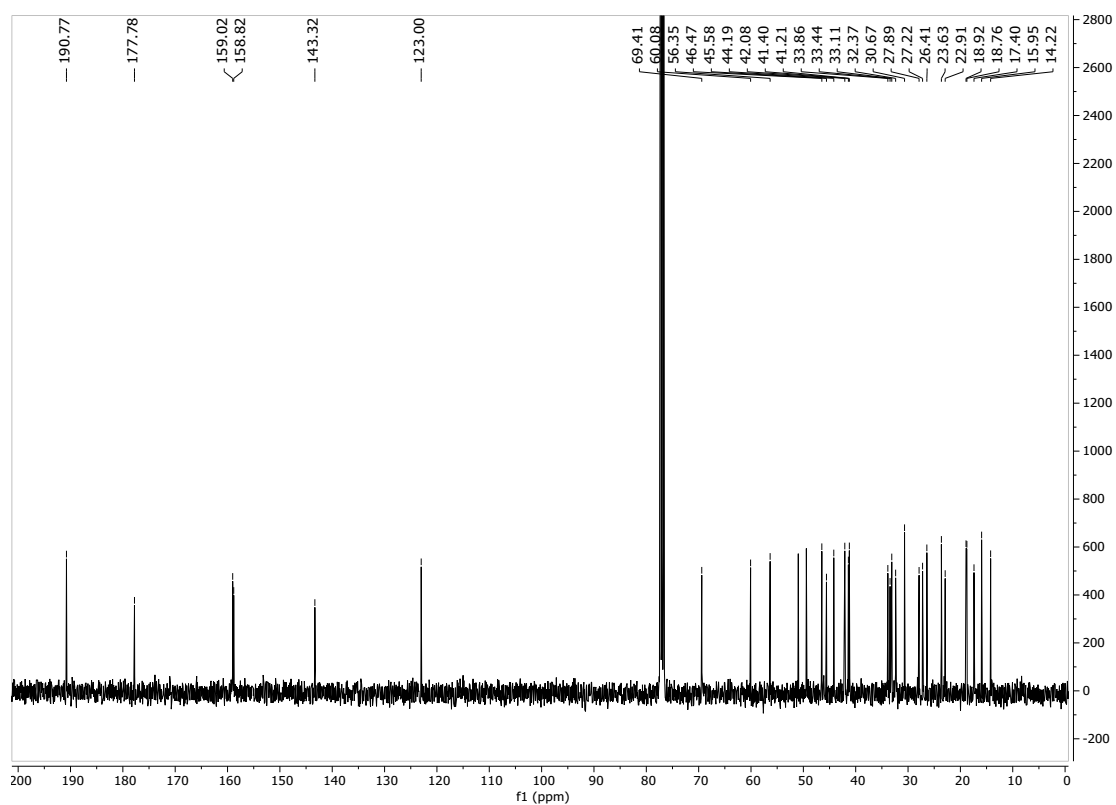

## 24. NMR data for compound 27

### 24.1 <sup>1</sup>H-NMR spectrum for compound 27 recorded in CDCl<sub>3</sub>

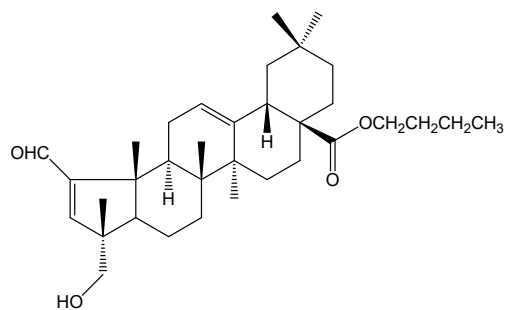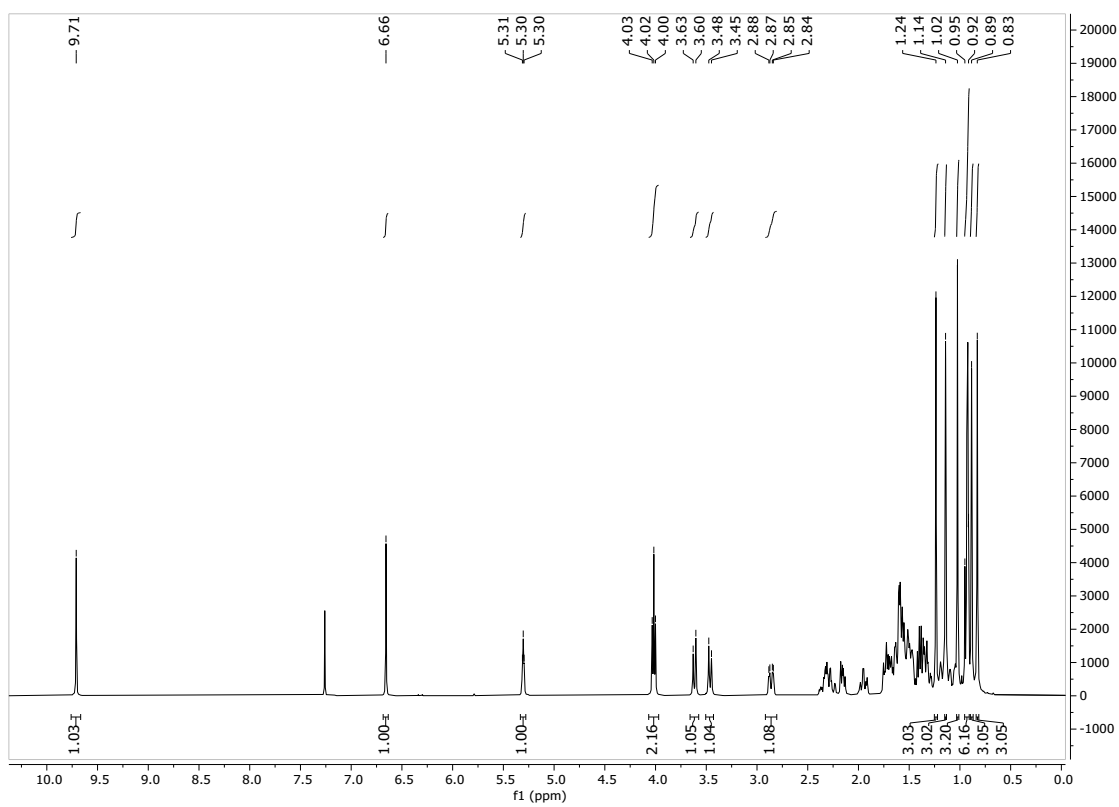

24.2  $^{13}\text{C}$ -NMR spectrum for compound 27 recorded in  $\text{CDCl}_3$

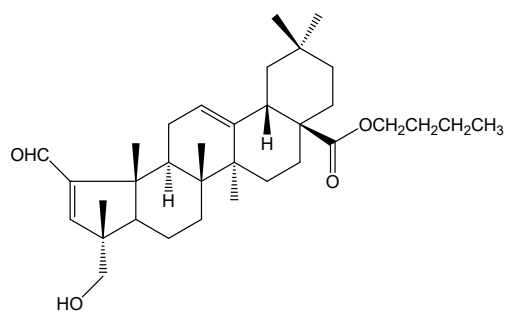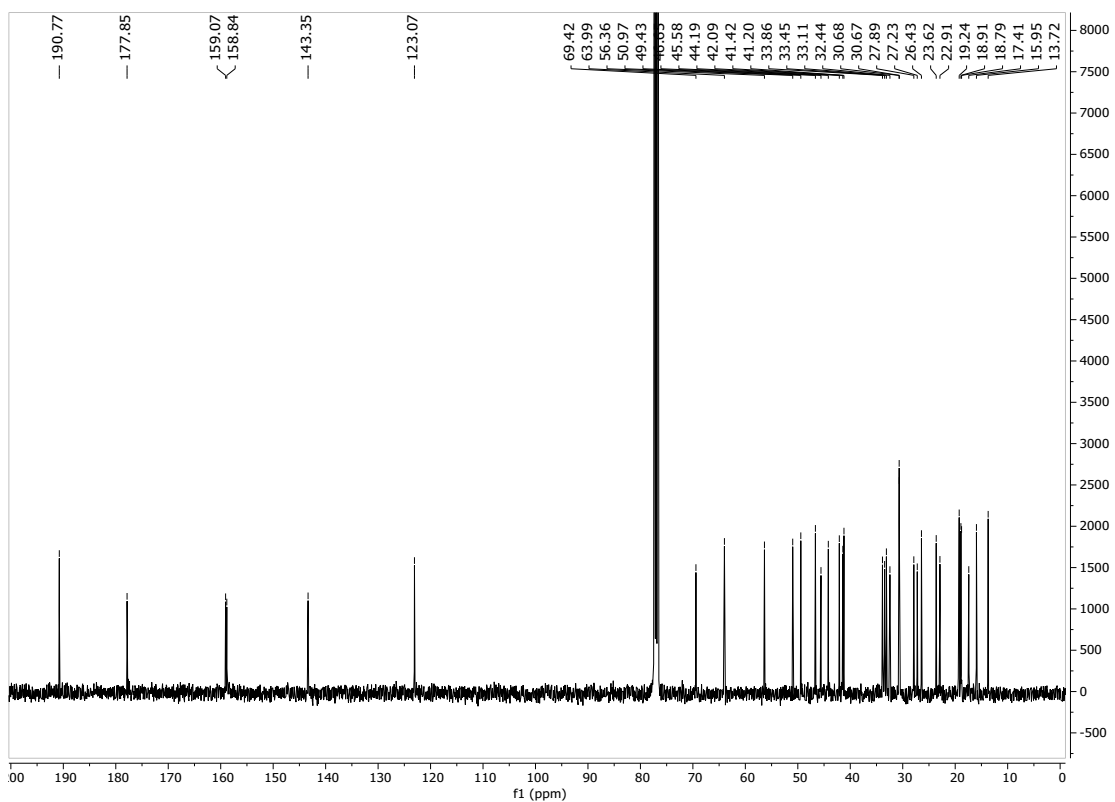



## 25. NMR data for compound 28

### 25.1 <sup>1</sup>H-NMR spectrum for compound 28 recorded in CDCl<sub>3</sub>

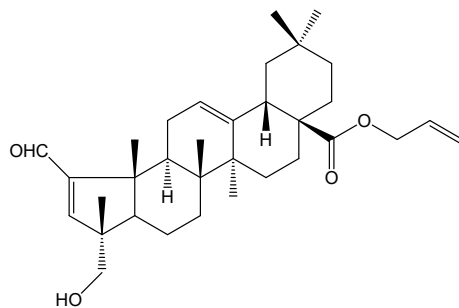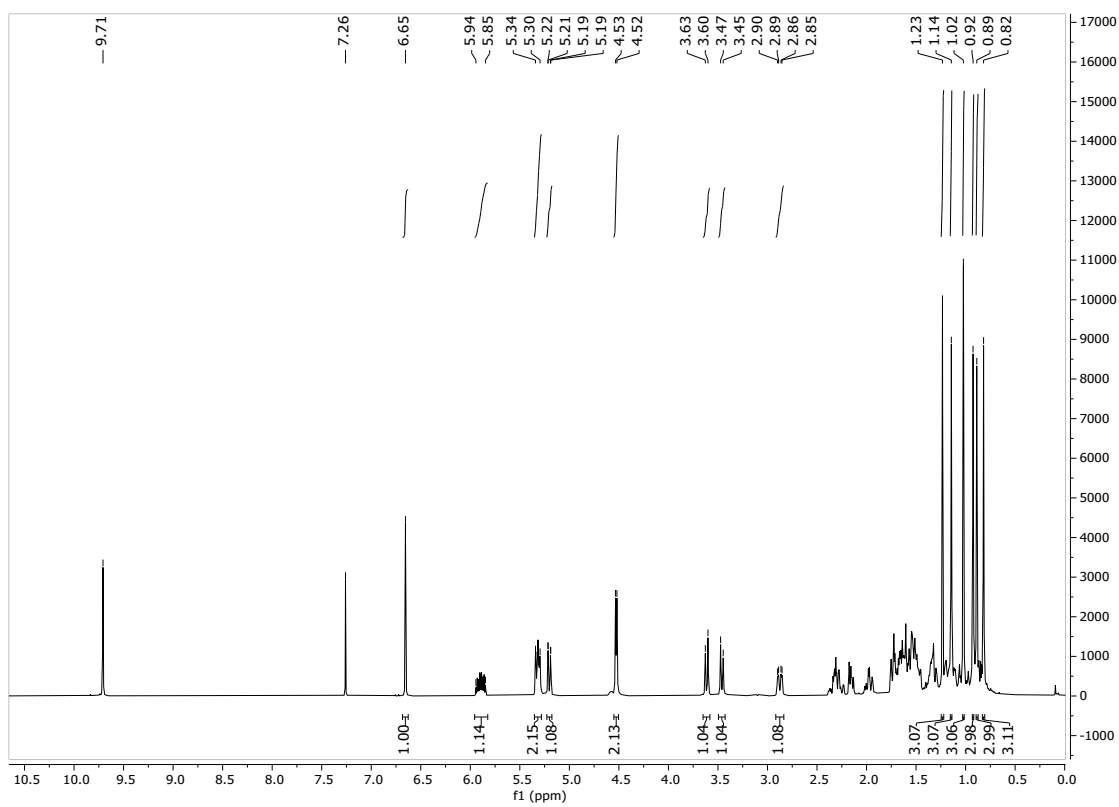

25.2  $^{13}\text{C}$ -NMR spectrum for compound 28 recorded in  $\text{CDCl}_3$

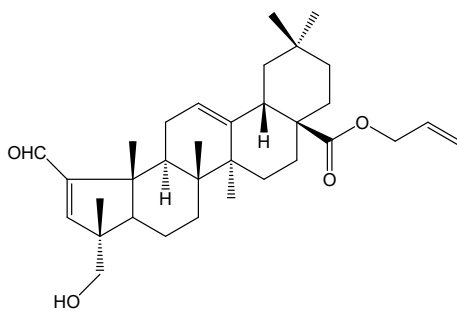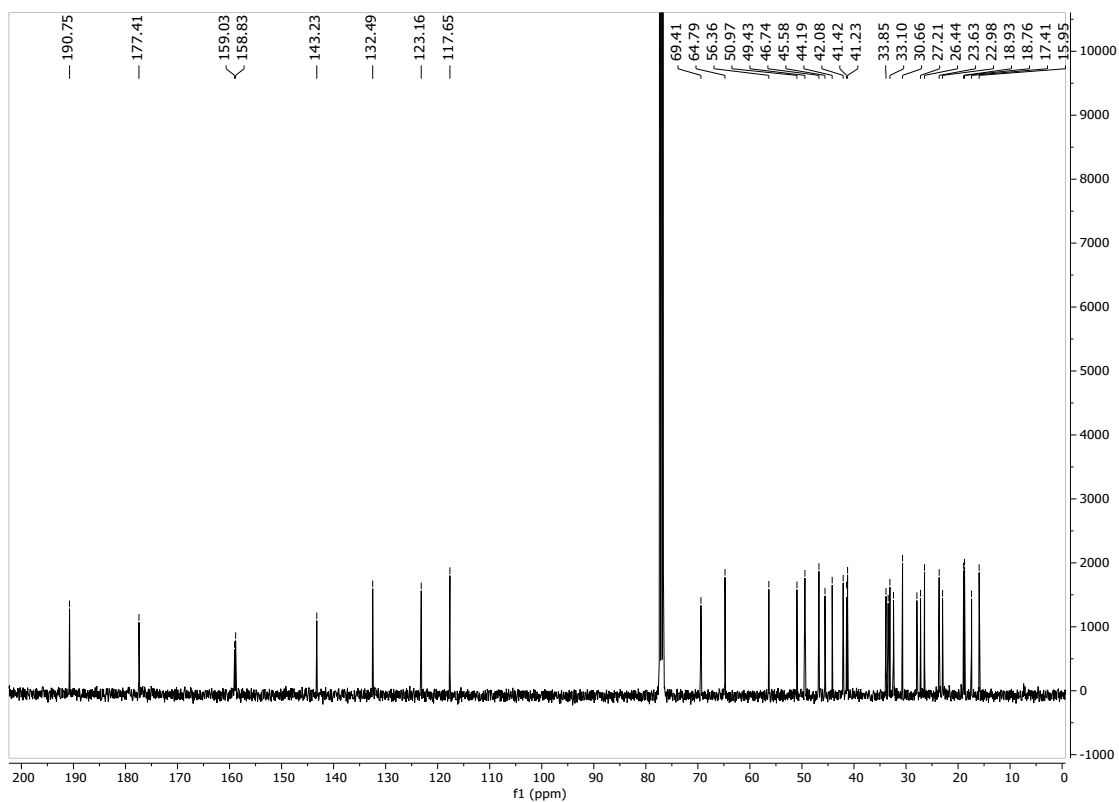

25.3 COSY spectrum for compound 28 recorded in CDCl<sub>3</sub>

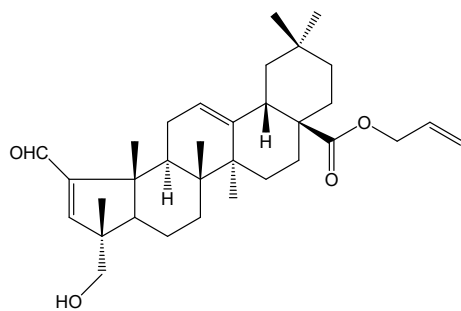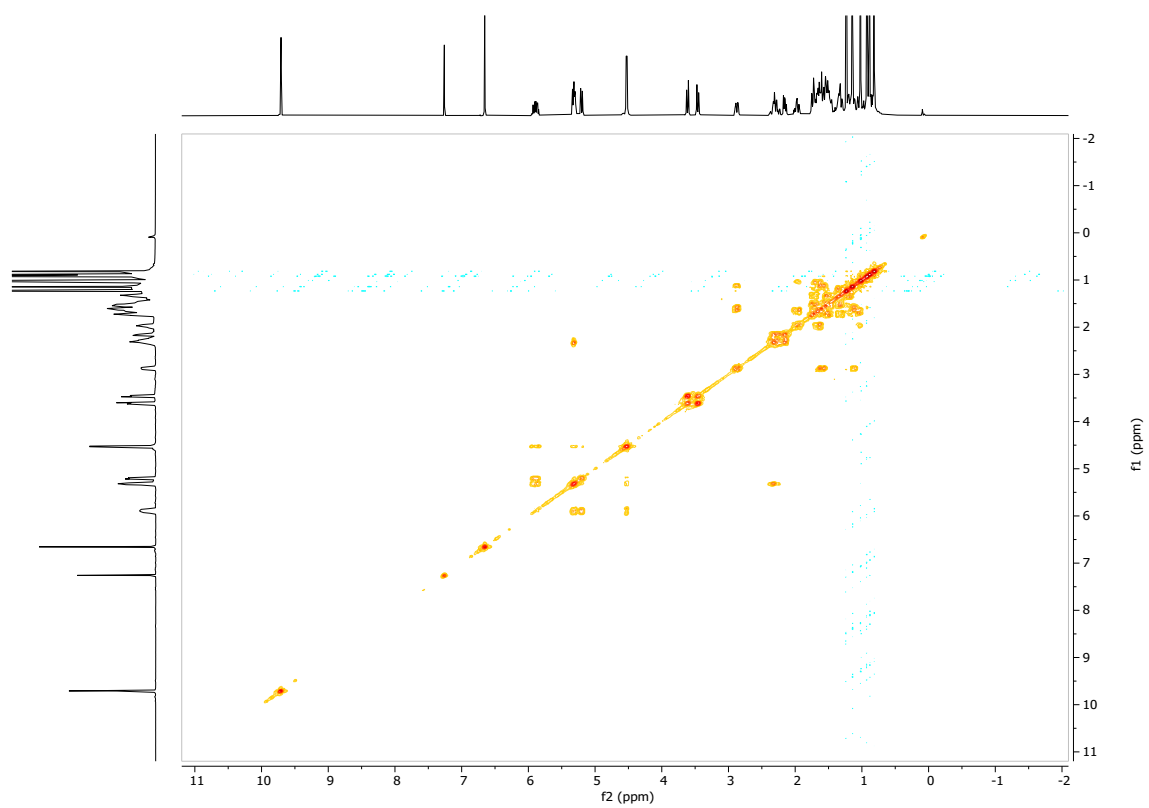

25.4 NOESY spectrum for compound 28 recorded in CDCl<sub>3</sub>

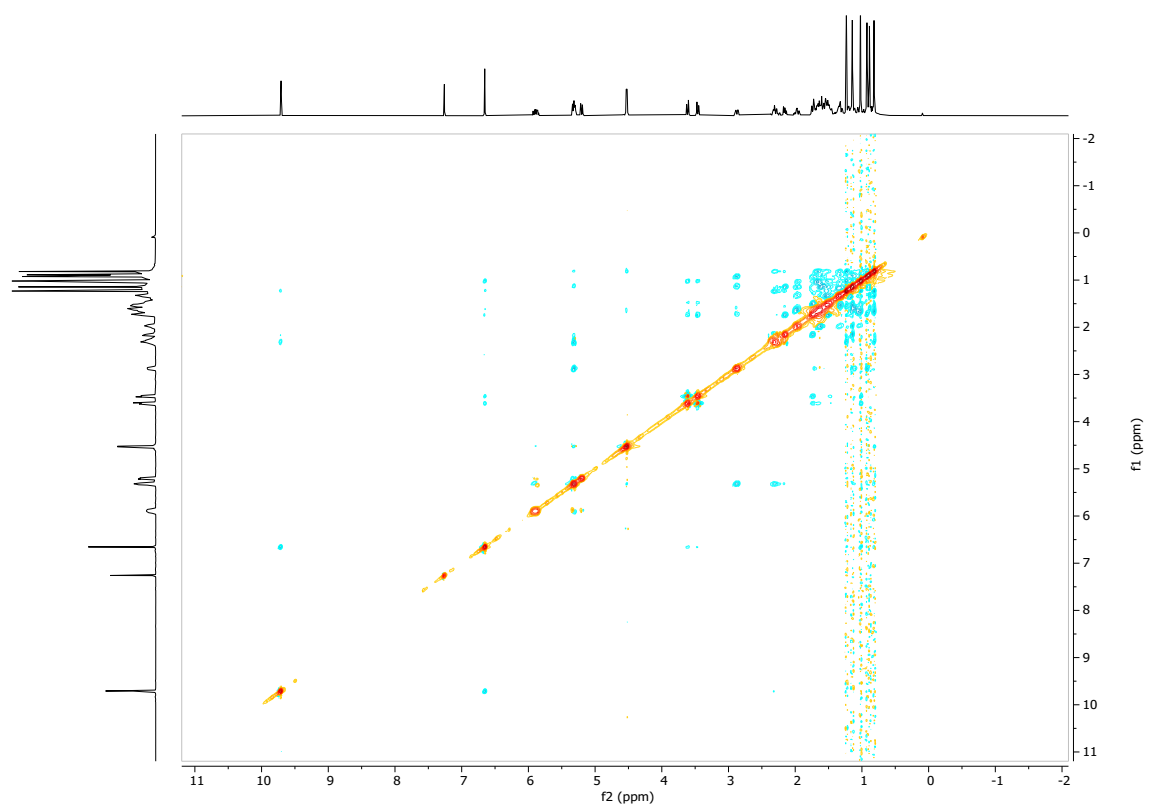

25.5 HSQC spectrum for compound 28 recorded in CDCl<sub>3</sub>

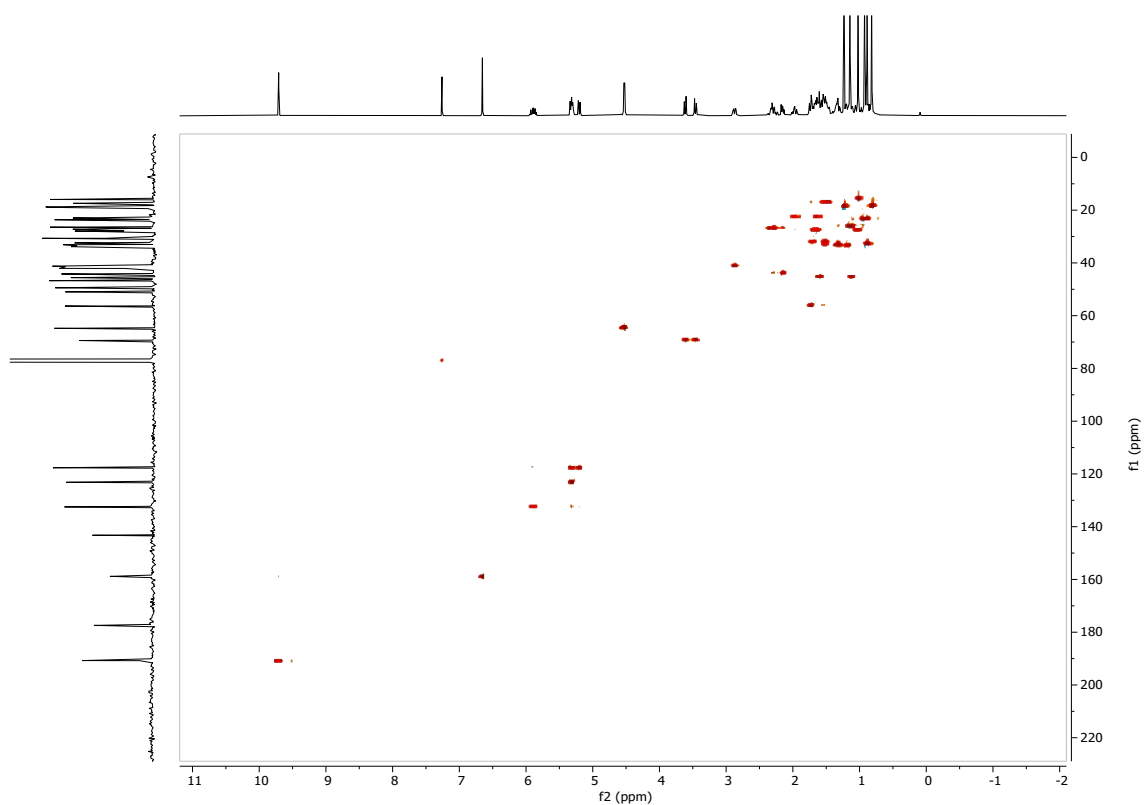

25.6 HMBC spectrum for compound 28 recorded in CDCl<sub>3</sub>

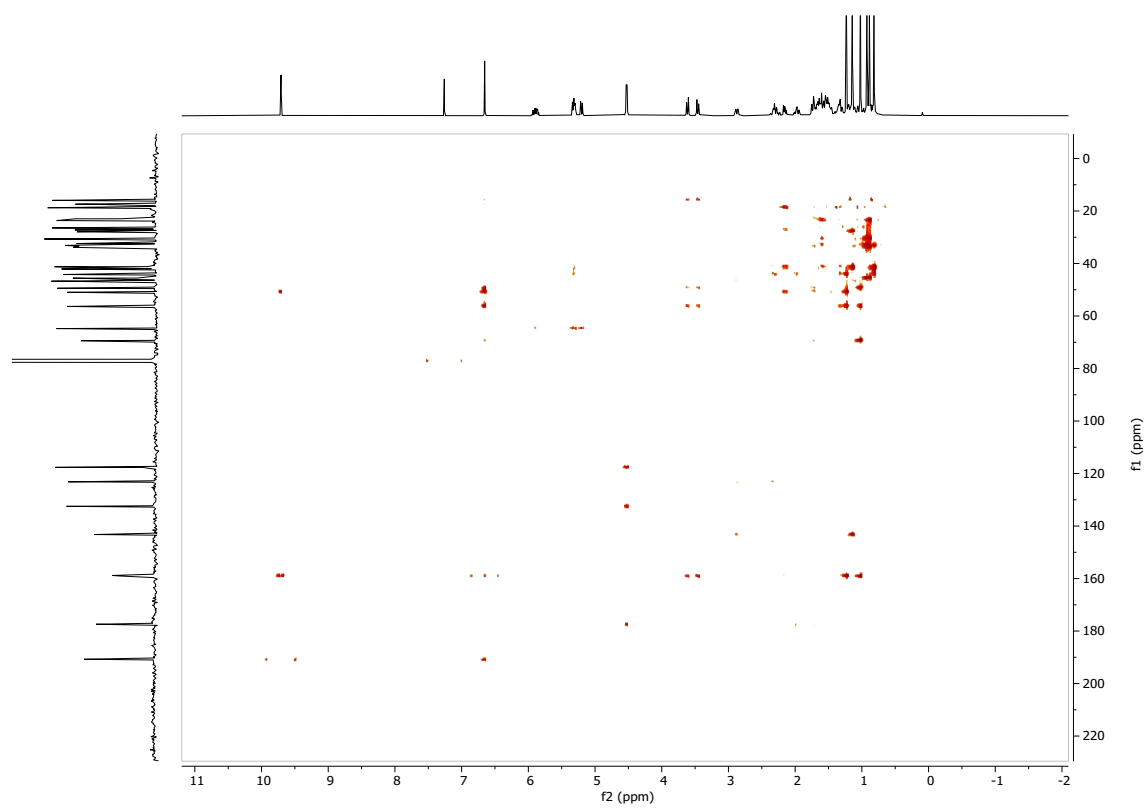

## 26. Some COSY correlations for compound 20

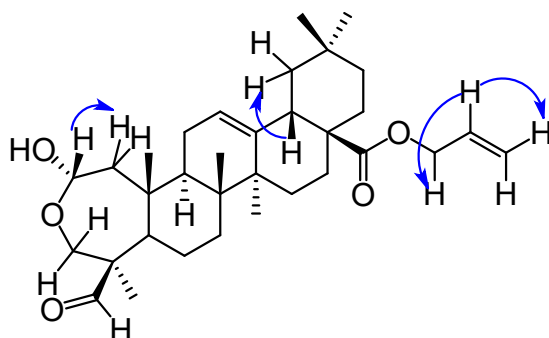

## 27. Some NOESY correlations for compound 20

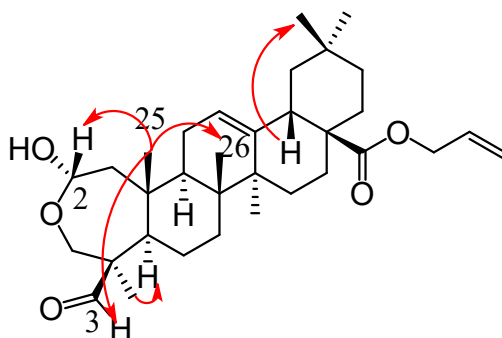

## 28. Some HMBC correlations for compound 20

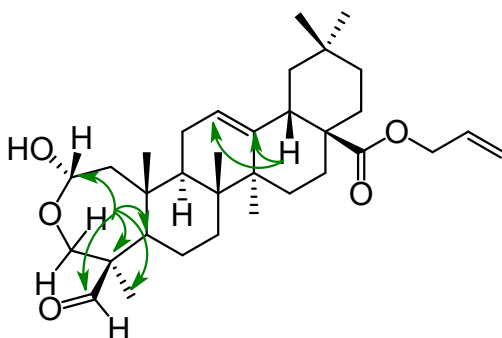





### 32. Proposed mechanism for the formation of derivatives 13-20.

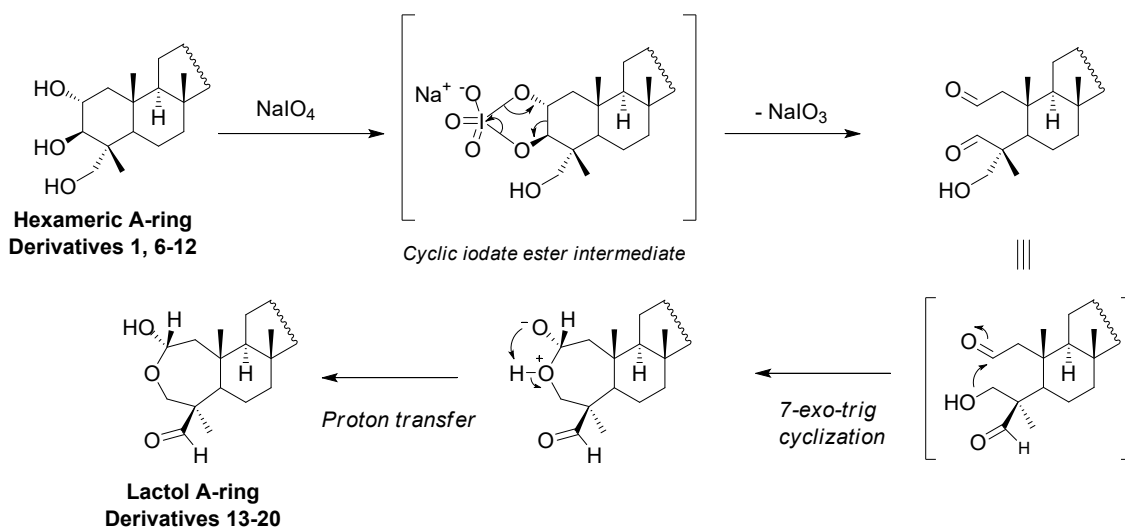

Conditions:  $\text{NaIO}_4$ ,  $\text{MeOH}/\text{H}_2\text{O}$ , r.t.;

### 33. Proposed mechanism for the formation of derivatives 21-28.

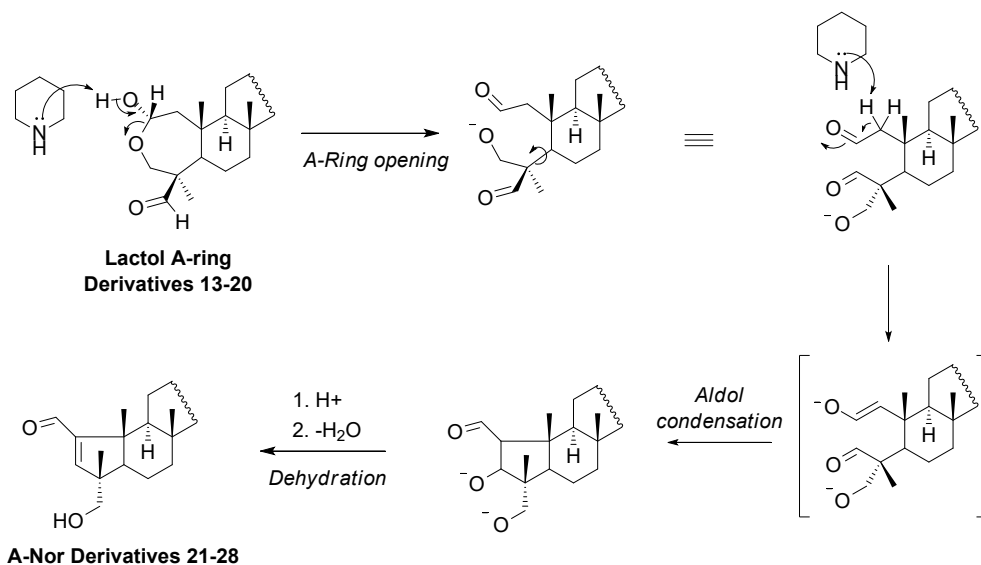

Conditions: one-pot- i - Piperidine, acetic acid, dry benzene, reflux  $60\text{ }^\circ\text{C}$ ,  $\text{N}_2$ ; ii - anhydrous  $\text{MgSO}_4$ , reflux  $60\text{ }^\circ\text{C}$ ,  $\text{N}_2$ .

### 34. In Silico studies.

After generation of SMILES notation, drug-likeness and absorption, distribution, metabolism, excretion, and toxicity (ADMET) parameters were predicted for compound **26** using SwissADME<sup>[1]</sup> and pkCSM<sup>[2]</sup> online softwares, as previously performed by some of us.<sup>[3]</sup>

#### 34.1 In silico molecular properties of compound 26 using the SwissADME predictive database.<sup>a</sup>

| Descriptor          |          | Value                               |
|---------------------|----------|-------------------------------------|
| Molecular weight    |          | 496.72 g/mol                        |
| iLog P              |          | 4.37                                |
| MLog P              |          | 5.16                                |
| nON                 |          | 4                                   |
| nOHNH               |          | 1                                   |
| n-rot               |          | 5                                   |
| TPSA                |          | 63.60 Å <sup>2</sup>                |
| Drug-likeness       | Lipinski | Yes; 1 violation (MLogP>4.15)       |
|                     | Veber    | Yes                                 |
| Medicinal Chemistry | PAINS    | 0 alert                             |
|                     | Brenk    | 2 alerts: aldehyde, isolated alkene |

<sup>a</sup> Octanol-water partition coefficient (LogP; iLogP is *implicit* LogP; MLogP is *Moriguchi* LogP); number of hydrogen bond acceptors (nON); number of hydrogen bond donors (nOHNH); number of rotatable bonds (n-rot); topological polar surface area (TPSA); Lipinski's rule of five: molecular weight < 500 Da; Log P < 5; n-OHNH < 5; n-OHNH < 10. A maximum of 1 violation is permitted. Veber's parameters: n-rot ≤ 10; TPSA ≤ 140 Å<sup>2</sup> or total of nON and nOHNH ≤ 12.

34.2 *In silico* pharmacokinetic (absorption, distribution, metabolism, and excretion) and toxicity parameters of compound 26 using pkCSM and SwissADME predictive databases.<sup>a</sup>

| Property     | Model Name                        | Predicted Value     |
|--------------|-----------------------------------|---------------------|
| Absorption   | Water solubility                  | -6.102 <sup>b</sup> |
|              | Intestinal absorption (human)     | 100%                |
|              | P-glycoprotein substrate          | Yes                 |
|              | P-glycoprotein I and II inhibitor | Yes                 |
| Distribution | BBB permeant                      | No                  |
|              | LogBB                             | -0.572              |
|              | LogPS                             | -1.429              |
| Metabolism   | CYP1A2 inhibitor                  | No                  |
|              | CYP2C19 inhibitor                 | No                  |
|              | CYP2C9 inhibitor                  | No                  |
|              | CYP2D6 inhibitor                  | No                  |
|              | CYP3A4 inhibitor                  | No                  |
|              | CYP2D6 substrate                  | No                  |
|              | CYP3A4 substrate                  | Yes                 |
| Excretion    | Log total clearance               | 0.078 <sup>c</sup>  |
|              | Renal OCT2 substrate              | No                  |
| Toxicity     | AMES toxicity                     | No                  |
|              | hERG I inhibitor                  | No                  |
|              | hERG II inhibitor                 | No                  |
|              | Hepatotoxicity                    | No                  |
|              | Skin Sensitisation                | No                  |

<sup>a</sup> Blood-brain barrier (BBB); logarithm of permeability in blood-brain barrier (logBB) < -1 are poorly distributed; blood-brain permeability-surface area product (logPS) > -2 are considered to penetrate the central nervous system and logPS < -3 are considered as unable to penetrate the central nervous system; human ether-a-go-go-related gene (hERG). <sup>b</sup> log(mol/L). <sup>c</sup> log(mL/min/kg).

#### References:

- 1- Daina, A.; Michielin, O.; Zoete, V. SwissADME: A free web tool to evaluate pharmacokinetics, drug-likeness and medicinal chemistry friendliness of small molecules. *Sci. Rep.* 2017, 7, 42717.
- 2- Pires, D.E.V.; Blundell, T.L.; Ascher, D.B. pkCSM: Predicting small-molecule pharmacokinetic and toxicity properties using graph-based signatures. *J. Med. Chem.* 2015, 58, 4066–4072.
- 3- a) Serrano JL, Lopes D, Reis MJA, Boto REF, Silvestre S, Almeida P. Bis-thiobarbiturates as Promising Xanthine Oxidase Inhibitors: Synthesis and Biological Evaluation. *Biomedicines*. 2021 Oct 11;9(10):1443. b) Cruz-Vicente P, Gonçalves AM, Ferreira O, Queiroz JA, Silvestre S, Passarinha LA, Gallardo E. Discovery of Small Molecules as Membrane-Bound Catechol-O-methyltransferase Inhibitors with Interest in Parkinson's Disease: Pharmacophore Modeling, Molecular Docking and In Vitro Experimental Validation Studies. *Pharmaceuticals (Basel)*. 2021 Dec 31;15(1):51.
